# Supplementary material for: Risk prediction model for acute stroke in elderly population in cold regions based on machine learning
Source: Research Square preprint supplement (doi:10.21203/rs.3.rs-5594368/v1), 2024-12-23
Supplement: Supplementary file 1 [file d6b2bc6a348c3fe8ce4893e3.xlsx]

## Sheet: Table S1-Supplementary materi
Table S1-Supplementary materials: Clinical data of the research group
Research Group	Clinical diagnosis	Date	Medical record number	NIHSS score	Gender (1 male, 2 females)	Age	Smoking history	Drinking history	History of hypertension	History of diabetes	History of coronary heart disease	Arterial plaque in the neck or/and lower limbs	Systolic blood pressure (90-140 mmHg)	Diastolic blood pressure (60-90 mmHg)	White blood cell count(4-10) × 109/L	NEUT#（2-7）×109/L	LYMPH#（0.7-4）×109/L	Neutrophil/lymphocyte ratio（NLR）	Platelet count（100-300）×109/L	MPV（7-11fl）	PDW（15-17%）	PCT(0.108-0.282%)	P-LCR(13-43%)	ALT（9-50U/L）	AST（15-40U/L）	γ-glutamyltransferase(0-60U/L)	ALP(45-125U/L)	TBA(0-10umol/L)	Prealbumin(200-430mg/L)	TP(65-85g/L)	ALB(40-55g/L)	Albumin/Globulin（A/G）1.2-2.4	TBIL(1.6-20.6umol/L)	DBIL(0-6.5umol/L)	IDBIL	CysC(0-1.16mg/L)	Crea（57-111umol/L)	UA（150-440umol/L)	GLU（3.9-6.1mmol/L）	CRP（Normal 0 Abnormal 1）	T-CH（1.80-5.17mmol/L）	TG（0.56-1.70mmol/L）	HDL-C（1.04-1.70mmol/L）	LDL-C（0.45-3.15mmol/L）	PT（8.6-13Sec）	PT%（80-120%）	PTR（0.8-1.2）	INR（0.8-1.2）	APTT（26-42Sec）
2	Thrombotic cerebral infarction	2021.01.01	2263017	6	1	61	No	Yes	No	No	No	No	133	81	7.3	4.83	1.75	2.76	227	8.6	8.7	0.19	14	11	15	15	60	2.2	267	57.7	34.1	1.4	13.3	6.8	6.5		74	323.4	5.17	0	3.82	1.09	0.93	2.49	11	102	1.02	1.02	32.5
3	Large-scale cerebral infarction	2021.01.02	2263281	13	1	65	No	No	Yes	No	No	Yes	170	110	20.8	19.42	0.94	20.6596	153	11.3	14.1	0.17	37.6	46	55	50	101			77.5	42.5	1.2	30	9.2	20.8		126	278.6	3.39	1	5.09	0.69			12	86	1.11	1.11	30.8
4	Intracerebral hemorrhage	2021.01.03	2263565	9	1	68	No	No	Yes	No	No	No	142	81	10	9.17	0.63	14.5556	255	10.2	11.2	0.26	25.3	11	22	6	63			63	39.2	1.8	21.4	6	15.4		84	198.2	6.53	0	3.44	0.17			11.2	98	1.04	1.04	28.6
5	Thrombotic cerebral infarction	2021.01.03	2263444	2	2	77	No	Yes	Yes	No	Yes	Yes	139	77	7.9	4.96	2.75	1.80364	233	10	10.8	0.23	24.2	6	7	9	93	1.8	113	65.2	34.8	1.1	11.3	6	5.3		64	384.8	5.39	0	3.47	0.6	0.88	2.49	12.9	75	1.19	1.19	28.7
6	Left basal ganglia hemorrhage	2021.01.04	2263626	3	2	73	No	No	No	No	No	No	164	80	7.9	6.47	1.15	5.62609	240	11.5	14.3	0.28	37.5	20	24	6	89			74.1	41.2	1.3	4.3	2.5	1.8		59	182.5	7.11	0	4.11	3.43			10.5	113	0.97	0.97	31.1
7	Intracerebral hemorrhage (non-traumatic)	2021.01.07	2266370	10	2	73	No	No	Yes	Yes	Yes	Yes	193	99	8.4	7.36	0.95	7.74737	266	11.6	14.4	0.31	37.9	14	17	76	134			80.3	42	1.1	15.9	4.6	11.3		67	242.4	13.86	0	9.08	5.22			11	102	1.02	1.02	30.2
8	Intracerebral hemorrhage (non-traumatic)	2021.01.08	1901072	2	1	65	No	No	Yes	No	Yes	Yes	150	100	8.3	7.2	1	7.2	153	12	15.8	0.18	40.5	21	17	13	109			71.8	44.5	1.6	11.9	3.7	8.2		104	349.8	8.16	0	3.49	3.28			11	102	1.02	1.02	30
9	Subarachnoid hemorrhage (SAH)	2021.01.12	2268530	0	2	68	Yes	No	Yes	Yes	No	No	166	77	10.5	7.56	2.51	3.01195	203	12.9	17.2	0.26	47.9	13	14	15	99			73.4	40.5	1.2	6.5	2.7	3.8		95	260.3	10.43	1	5.25	1.49			11	102	1.02	1.02	32.4
10	Subarachnoid hemorrhage (SAH)	2021.01.13	2268570	0	2	60	Yes	No	No	No	No	No	103	63	7.9	5.33	2.4	2.22083	218	11.1	13.6	0.24	34.2	25	22	10	115			74.6	41.3	1.2	17.7	4.5	13.2		68	314.1	6.33	0	6.45	1.25			11.6	86	1.07	1.07	33.9
11	Thalamic hemorrhage	2021.01.13	2269061	9	2	67	No	No	Yes	No	No	No	156	89	8.5	7.91	0.59	13.4068	245	9.9	10.7	0.24	23.6	20	24	7	132			75.2	42.3	1.3	11.1	4.3	6.8		58	148.9	7.13	0	4.63	0.37			11.6	86	1.07	1.07	37.2
12	Subarachnoid hemorrhage (SAH)	2021.01.13	2269072	2	2	71	No	No	Yes	No	No	No	123	78	12.5	10.89	1.5	7.26	246	10.9	13.2	0.27	31.7	16	14	15	88			73.6	44.3	1.5	13.1	3.8	9.3		44	274.3	6.39	1	4.81	1.3			11.1	100	1.03	1.03	30.8
13	Intracerebral hemorrhage (non-traumatic)	2021.01.15	2269674	9	1	62	No	No	Yes	Yes	No	No	156	85	7.8	7.16	0.61	11.7377	198	11.3	13.3	0.22	36.1	30	43	94	68			69.3	41.8	1.5	13.5	5.3	8.2		71	158.3	11.86	0	4.95	1.32			10.4	115	0.96	0.96	39.1
14	Cerebral infarction due to occlusion or stenosis of the cerebral artery	2021.01.17	1905474	2	1	76	No	No	No	Yes	No	Yes	162	104	9.5	7.42	1.16	6.39655	174	11.2	13.9	0.2	35.2	17	13	11	56			72.8	44.9	1.6	9.8	4.4	5.4	0.68	68	387	16.23	0					11.8	89	1.09	1.09	35.5
15	Thrombotic cerebral infarction	2021.01.18	2270304	2	1	63	No	No	Yes	Yes	Yes	Yes	182	139	10.2	7.87	1.77	4.44633	148	9.6	11.3	0.14	22.8	20	16	14	111			76	47.6	1.7	15.7	4.9	10.8	1.06	86	459	9.48	1	3.13	0.71	1	1.81	12	86	1.11	1.11	32.2
16	Brainstem infarction	2021.01.21	2271060	1	2	72	No	No	No	No	Yes	Yes	140	70	7.5	4.51	2.44	1.84836	210	8.6	8.9	0.18	14.6	19	18	29	90			67.5	42.2	1.7	9.7	3.4	6.3		74	395.9	5.31	0	5.4	2.09	1.09	2.97	10.8	106	1	1	41.1
17	Large infarction in the left hemisphere	2021.01.22	2271064	15	1	65	No	Yes	Yes	No	No	Yes	150	70	13.5	11.65	1.42	8.20423	149	14.6	22.8	0.22	60.5	19	14	21	73	4.7	185	66.9	46.1	2.2	9.7	4.1	5.6	1.45	90	122.5	7.49	1	2.71	0.98	1.04	1.23	10.8	106	1	1	38.8
18	Brainstem infarction	2021.01.23	2271242	1	1	64	Yes	No	No	Yes	No	Yes	172	100	8.5	5.82	2.2	2.64545	209	9.4	10.3	0.2	20.8	17	20	20	110			76.1	42.9	1.3	15.8	4.1	11.7		87	282.2		0					10.4	115	0.96	0.96	33.3
19	intracerebral hemorrhage	2021.01.23	2271335	13	2	62	No	No	Yes	No	No	Yes	166	83	8.7	6.3	1.71	3.68421	202	11	13.3	0.22	33	11	15	13	6646			61.1	38.8	1.7	12.3	4.3	8		57	124.2	5.17	0					11.8	83	1.09	1.09	35.1
20	Acute cerebral infarction in the left hemisphere	2021.01.24	2271385	2	2	60	Yes	No	No	No	Yes	No	99	72										19	14	29	98			70.3	43.9	1.7	6.6	2.9	3.7		71	296.5	6.69		5.81	0.78	1.36	4.24	10.3	107	0.95	0.95	28.9
21	Thrombotic cerebral infarction	2021.01.25	2271618	2	2	77	No	No	No	No	No	Yes	146	86	6.6	4.34	1.78	2.4382	216	9	10.1	0.19	16.9	13	22	15	93	5	237	82.3	44.1	1.2	8	3.2	4.8	0.66	65	333.9	4.54	0	5.45	1.61	1.22	3.63	14.4	62	1.33	1.33	29.5
22	Multiple cerebral infarctions	2021.01.27	2272000	0	1	62	Yes	No	No	No	No	Yes	154	85	9.8	6.2	2.6	2.38462	248	9.1	16.4	0.225		13	16	20	99			69	46.2	2	11.4	4.7	6.7		82	283.1	5.15	0	4.57	0.6	1.04	3.42	11.2	98	1.04	1.04	37.1
23	Acute cerebral infarction	2021.01.31	2272412	16	1	65	No	No	No	No	No	Yes	146	90	15.3	13.37	1.86	7.18817	35					50	52	14	102			78.8	40.3	1	17.9	6.5	11.4		136	683.1	8.67	1	3.39	2.63	0.51	1.79	12.1	84	1.12	1.12	33.6
24	Multiple cerebral infarctions	2021.02.01	2272640	3	1	67	No	Yes	Yes	No	Yes	Yes	170	90	4.45	3.95	1.68	2.35119	127	9.7	11.4	0.12	22.5	15	14	15	78			78.8	48.7	1.6	26.1	7.3	18.8		82	339.9	6.04	0	3.49	0.9	0.99	2.08	11.4	95	1.06	1.06	35.3
25	Thrombotic cerebral infarction	2021.02.02	2272804	16	1	61	Yes	No	No	No	Yes	Yes	173	95	10.7	8.4	1.5	5.6	179	11.4	17	0.203	45	34	27	20	96	3.5	110	66.3	41.3	1.7	34	14.6	19.4	0.85	63	222	4.56	1	4.13	0.84	0.77	3.04	13.1	73	1.21	1.21	37.2
26	Subarachnoid hemorrhage (SAH)	2021.02.02	2272759	0	1	71	No	No	No	No	No	No	124	78	4.6	4.03	0.44	9.15909	154	11.5	13.2	0.18	37.1	23	41	29	91			69.3	43.6	1.7	10.8	4.6	6.2		47	205.7	6.38	0	3.66	0.46			10.9	104	1.01	1.01	28.9
27	large-scale cerebral infarction	2021.02.03	1972809	9	1	67	No	Yes	Yes	Yes	No	Yes	168	78	12.1	9.54	1.83	5.21311	234	13.6	20.3	0.32	53.6	9	10	26	63	4.4	167	70.6	42.5	1.5	13	4.6	8.4	0.8	88	426.7	6.88	1	3.75	1.49	0.92	2.26	12.6	78	1.17	1.17	34.2
28	Multiple cerebral infarctions	2021.02.08	2273440	3	1	78	No	Yes	Yes	No	No	Yes	162	77	8.9	7.71	0.75	10.28	298	10	10.8	0.3	24.6	15	16	29	66	6.4	239	71.2	41.8	1.4	14.6	5.1	9.5		71	307.9	6.1	0	3.85	2.24	0.85	1.88	11.4	95	1.06	1.06	25.4
29	Cerebral infarction due to embolism	2021.02.11	2252217	22	2	80	No	No	Yes	Yes	No	Yes	127	91	10.9	9.26	1.11	8.34234	229	10.3	11.5	0.24	26.7	15	17	10	153			64.9	42	1.8	13.2	3.8	9.4	1.07	72	289	10.21	1					12.7	77	1.18	1.18	28.3
30	创伤性Subarachnoid hemorrhage (SAH)	2021.02.11	2273715	3	1	65	No	No	No	No	No	Yes	127	88	5.7	3.53	1.69	2.08876	132	9.7	10.8	0.13	21.9	26	19	14	60			65.4	40.9	1.7	20	6.5	13.5		71	179.6	5.33	0					11.7	90	1.08	1.08	29.8
31	Hemorrhagic cerebral infarction	2021.02.12	2273878	0	2	65	No	No	No	No	No	Yes	193	91	8.6	5.5	2.84	1.93662	285	95.4	11.7	0.29	25.9	14	18	17	77	6.1	202	69.8	41	1.4	5.7	2.3	3.4	0.66	49	144	5.58	0	4.27	1.32	1.17	2.32	11.3	97	1.05	1.05	33.3
32	Subarachnoid hemorrhage (SAH)	2021.02.12	2273851	1	2	61	No	No	Yes	No	No	No	157	82	10.1	9.04	0.9	10.0444	232	11.8	14.8	0.27	40.3	17	12	1	0.7			70.2	42.3	1.5	27.9	7.4	2.7		47	147.6	6.47	1	3.53	0.31			11.5	93	1.06	1.06	24
33	intracerebral hemorrhage	2021.02.12	2273854	7	1	62	No	No	No	No	No	No	183	119	4.7	2.79	1.68	1.66071	232	10.3	11.9	0.24	27.1	31	43	183	92			63.7	39.9	1.7	14.4	4.9	9.5		73	410.2	4.53	0	6.05	1.38			10.7	108	0.99	0.99	28
34	Thalamic hemorrhage	2021.02.12	2227384	3	1	68	No	No	No	No	No	No	157	91	5.2	2.8	1.92	1.45833	230	10.8	13.5	0.25	31.2	22	21	31	119			70.6	38.9	1.2	13.9	5.3	8.6		75	254.7	7.93	0	4.23	0.78			10.7	108	0.99	0.99	29.8
35	Cerebral infarction	2021.02.14	2274071	9	2	65	No	No	No	No	No	Yes	158	91	13.5	11.1	1.9	5.84211	239	9.8	10.6	0.24	23.3	14	12	24	97	1.8	227	64.8	37.9	1.4	14	3.8	10.2		54	376	14.25	1	6.16	4.38	1.16	3.16	10.9	104	1.01	1.01	28.5
36	Thrombotic cerebral infarction	2021.02.15	2274324	0	2	60	No	No	Yes	No	No	Yes	162	75	6.3	2.77	3	0.923333	201	9	8.8	0.18	16.6	20	14	11	95			81.3	46.6	1.3	4.8	1.3	3.5		75	282.8	6.08	0	5.66	1.48	0.95	3.62	9.8	133	0.91	0.91	35.7
37	intracerebral hemorrhage	2021.02.16	2274342	11	1	68	No	No	No	Yes	Yes	Yes	154	91	5.3	4.44	0.81	5.48148	145	11.6	14.2	0.17	13.43	20	22	12	127			71.5	40.8	1.3	8.4	4.3	4.1		43	198.9	8.94	0					12.5	79	1.16	1.16	45.9
38	Cerebral infarction due to occlusion or stenosis of the cerebral artery	2021.02.18	2274763	20	2	83	No	No	No	No	No	Yes	153	71	7.4	6.14	1.09	5.63303	173	10.3	11.9	0.18	27.9	21	24	12	99			78.8	43.3	1.2	8.6	4.4	4.2		98	299.6	5.31	0	3.86	0.81	1.33	1.94	11.6	92	1.07	1.07	26.9
39	Basal ganglia infarction	2021.02.19	2274872	2	1	61	No	No	No	Yes	No	Yes	139	88	7.6	4.74	2.15	2.20465	216	10.5	16.5	0.228		22	12	27	43	2.6	245	62.2	40.1	1.8	16.1	4.8	11.3		78	436.3	5.28	0	4.56	1.12	0.82	3.36	11.1	100	1.03	1.03	30.8
40	intracerebral hemorrhage	2021.02.20	2275331	15	1	77	No	No	Yes	No	Yes	Yes	145	70					158	11.7	15.5	0.18	37.8	51	52	31	128			62.9	33.6	1.1	9.1	4.7	4.4		101	180.6		0					12.3	82	1.14	1.14	33.8
41	Thrombotic cerebral infarction	2021.02.21	2275525	11	1	63	Yes	No	Yes	No	No	Yes	202	122	15	12.89	1.6	8.05625	174	10.5	12.2	0.18	28.5	17	16	21	75			76.8	47.6	1.6	10.2	3.5	6.7		72	315.1	12.45	1	4.82	1.37	0.96	3.32	10.8	106	1	1	33.9
42	Cerebral infarction	2021.02.24	2276499	3	2	64	No	No	Yes	No	No	Yes	165	90	7.8	5.17	1.77	2.9209	229	8.8	9.3	0.2	16.8	26	28	14	102			80.2	41.2	1.1	5.4	3.3	2.1		96	390.7	7.91	0	3.8	1.35	0.86	2.33	12.1	84	1.12	1.12	34.7
43	Right basal ganglia hemorrhage	2021.02.25	2276816	5	1	64	No	No	Yes	No	No	No	145	100	3	2.32	0.59	3.9322	164	9.9	11.6	0.16	23.5	12	17	7	88			68.7	37.9	1.2	9.8	3.3	6.5		235	583.2	6.68	0					11.3	97	1.05	1.05	28
44	large-scale cerebral infarction	2021.02.26	2277003	13	1	62	No	No	Yes	No	No	No	167	96	18.3	16.76	1.54	10.8831	286	10.8	12.8	0.31	300.9	24	18	12	99			74.4	46.7	1.7	7.9	3.4	4.5		58	236.4	8.27	1					11.7	90	1.08	1.08	31.3
45	Brainstem infarction	2021.02.27	2277590	21	2	68	No	No	Yes	Yes	No	No	140	64										44	22	0.5	105			82.1	47.3	1.4	9.7	3.6	6.1		71	260.5	15.52		6.26	1.69	1.21	4.17	13.8	66	1.28	1.28	54.5
46	Thrombotic cerebral infarction	2021.02.28	2277844	6	1	76	Yes	Yes	No	No	No	Yes	139	78	6.6	4.09	2.14	1.91121	213	9.9	11.6	0.21	24.5	14	12	27	100			72.4	44.1	1.6	5.8	3	2.8	0.93	77	301.1	5.08	0	3.93	0.85	1.18	2.35	10.5	113	0.97	0.97	37.7
47	Thrombotic cerebral infarction	2021.02.29	2293265	7	2	71	No	No	Yes	No	No	Yes	173	116	7.7	5.5	2.16	2.5463	233	11.3	13.9	0.26	36.2	10	13	16	66	1.2	192	71.4	39.3	1.2	22.3	8.3	14	0.97	71	302.4	4.53	0	5.67	1.04	1.04	4.49	11.1	93	1.03	1.03	31.8
48	Thrombotic cerebral infarction	2021.03.03	2279432	3	1	70	No	No	No	No	No	Yes	154	90	9	7.63	1.17	6.52137	245	10.9	14.2	0.27		10	14	21	67	3.5	179	63.1	38.6	1.6	14.9	6	8.9		69	392.6	4.1	0	5.15	2.09	0.8	3.41	11.3	97	1.05	1.05	38.1
49	Thrombotic cerebral infarction	2021.03.03	2289780	1	2	65	Yes	No	No	No	Yes	Yes	159	79	5.9	4.44	1.12	3.96429	268	10.4	41.5	0.28	27.6	6	11	8	99	4.1	123	58.7	38	1.8	9.8	4.2	5.6		51	228.4	4.37	1	3.59	0.89	1.04	2.12	11.1	93	1.03	1.03	35.4
50	intracerebral hemorrhage	2021.03.04	2280182	7	2	77	No	No	No	No	No	No	171	88	9.2	7.48	1.4	5.34286	190	11	14	0.21	34.4	16	19	32	68			77.2	41.3	1.2	7.5	2.7	4.8		92	317.9	14.85	0	4.44	2.11			11	102	1.02	1.02	33
51	Multiple cerebral infarctions	2021.03.05	2280716	1	1	74	Yes	Yes	Yes	No	Yes	Yes	169	91	8.2	7.01	0.49	14.3061	218	13.2	17.4	0.29	50.4	105	84	256	128	44.7	232	75.6	36.2	0.9	20	10.6	9.4		85	346.2	10.71	0	3.12	0.81	1.27	1.54	12	86	1.11	1.11	33.6
52	Subarachnoid hemorrhage (SAH)	2021.03.06	2280961	1	2	71	No	No	Yes	No	No	No	133	77	11.6	9.13	2.2	4.15	330	10.2	11.9	0.34	26.1	30	28	55	108			76.3	39.9	1.1	16.7	6.9	9.8		72	246.4	7.84	1	5.81	1.97			10.3	118	0.95	0.95	33.3
53	intracerebral hemorrhage	2021.03.07	2281148	1	1	63	No	No	Yes	No	No	No	182	108	6.1	4.64	1.34	3.46269	170	10.4	11.9	0.18	27.8	34	22	27	93			75.1	42.7	1.3	13.4	5.1	8.3		88	227.3	9.26	0					10.8	106	1	1	31
54	intracerebral hemorrhage	2021.03.07	2281267	5	2	68	No	No	Yes	No	Yes	Yes	154	102	11.4	8.19	2.7	3.03333	278	11.9	15.2	0.33	40.3	19	14	8	102			73.1	39	1.1	10.9	4.3	6.6		67	243.9	5.56	1					11.4	95	1.06	1.06	37.2
55	Cerebral infarction due to cerebral artery stenosis	2021.03.12	2284020	9	1	70	No	No	Yes	No	Yes	Yes	155	94	7.3	6.29	0.88	7.14773	264	11.1	12.8	0.29	33.7	10	13	19	97	1.9	244	72.9	42.7	1.4	22	7.6	14.4		102	442	5.87	0	5.47	0.92	1.26	3.53	11.7	90	1.08	1.08	33
56	intracerebral hemorrhage	2021.03.17	2286798	4	1	73	Yes	Yes	No	No	No	No	169	97	3.6	2.21	1.2	1.84167	107	10.6	11.7	0.11	28.8	12	40	10	54			70.6	41.1	1.4	45.2	13.3	13.3		71	261	3.69	0					14.2	61	1.31	1.31	33
57	intracerebral hemorrhage	2021.03.17	2286774	4	2	69	No	No	No	No	No	Yes	171	108	8.1	5.99	1.87	3.20321	273	11	13.3	0.3	33.5	26	25	6	93			74.8	46	1.6	16.4	7.3	9.1		53	191.5	5.96	0					11.5	87	1.06	1.06	38.2
58	Right occipital lobe hemorrhage	2021.03.17	2286594	13	2	71	Yes	No	Yes	No	No	Yes	154	102	10	7.85	1.83	4.28962	165	13.3	19.1	0.22	52.3	24	18	27	63			76.8	44	1.3	26	7.3	18.7		114	352.5	9.24	0					11.5	87	1.06	1.06	32.4
59	intracerebral hemorrhage	2021.04.01	2294716	11	1	68	No	No	Yes	Yes	Yes	Yes	161	92	10.4	8.93	1.28	6.97656	252	10.3	12.1	0.26	26.4	22	12	16	58			74.4	42	1.3	14.8	4.8	10		74	232.2	8.95	1					10.9	96	1.01	1.01	31.5
60	Intracerebral hemorrhage (non-traumatic)	2021.04.03	2295794	1	1	65	No	No	No	No	No	No	120	80	11.6	9.29	1.93	4.81347	226	11	13.9	0.25	33.7	18	20	8	50			72.8	42.5	1.4	8.4	3.2	5.2		82	332.3	6.57	1	5	0.75			9.9	116	0.92	0.92	31.1
61	Brainstem infarction	2021.04.07	2298284	0	1	65	No	No	Yes	No	No	Yes	172	78	8.6	4.71	3.4	1.38529	296	10.7	12	0.32	29.9	29	27	42	87	5.3	209	75.5	44.7	1.4	9.6	3.8	5.8		60	315.2	5.56	0	5.81	1.79	1.01	3.95	11.3	97	1.05	1.05	32
62	intracerebral hemorrhage	2021.04.08	2298691	0	1	60	No	No	Yes	No	No	No	133	92	6.3	4.29	1.49	2.87919	341	10.2	11.2	0.35	25.9	22	25	16	103			63.3	40.6	1.8	8.7	3.4	5.3		83	290.4	4.34	0	5.09	1.44			11.4	95	1.06	1.06	31.9
63	Brainstem infarction	2021.04.10	2299827	0	1	70	Yes	No	Yes	Yes	No	Yes	166	80	6.5	4.18	1.92	2.17708	234	10.4	11.8	0.24	27.2	11	16	17	78	5.1	236	69.3	44	1.8	10.3	3.7	6.6		78	291.9	12.72	0	3.31	0.68	1.16	1.75	11.8	89	1.09	1.09	36.9
64	Intracerebral hemorrhage (non-traumatic)	2021.04.11	2300182	16	2	72	No	No	No	No	No	Yes	160	110	16.6	14.76	1.4	10.5429	280	10.6	12.1	0.3	29.6	20	38	7	112			83	43	1.1	5.1	2.4	2.7		71	345.4	13.87	1	5.2	1.05			12.4	77	1.15	1.15	29.2
65	Thrombotic cerebral infarction	2021.04.12	2300991	13	1	63	Yes	No	No	No	No	No	128	82	7.7	5.43	1.76	3.08523	154	11	14.8	0.17	32.8	14	19	41	76	2.1	180	71.4	42.8	1.5	23	6.2	16.8		67	432	5.71	0	5.69	2.22	1	3.95	10.7	108	0.99	0.99	33.3
66	intracerebral hemorrhage	2021.04.14	2302439	6	2	68	No	No	Yes	No	No	No	208	168	7.8	6.53	1.08	6.0463	304	10.6	12.4	0.32	30.5	18	12	24	127			84.7	50.7	1.5	19.5	5.7	13.8		62	235	6.9	0					11.6	86	1.07	1.07	21
67	Brainstem infarction	2021.04.15	2303071	2	1	80	Yes	Yes	Yes	No	No	Yes	149	90	9.1	6.14	2.45	2.50612	390	9.5	10	0.36	18.2	5	10	15	82	11.5	172	70.3	38.9	1.2	10.9	3.6	7.3		75	4055.3	5.95	0	3.88	1.03	0.85	2.65	11.6	86	1.07	1.07	36.4
68	intracerebral hemorrhage	2021.04.16	2303776	4	2	71	No	No	Yes	No	No	Yes	171	90	8.7	7.8	9.4	0.829787	202	10.7	12.4	0.22	30.1	12	20	5	85			74.1	40.8	1.2	8.7	2.9	5.8		91	388.2	7.71	0					12.1	84	1.12	1.12	28.2
69	intracerebral hemorrhage	2021.04.17	2303835	11	2	80	No	No	No	No	No	No	129	50	8.6	7.93	0.61	13	211	11.5	13.5	0.24	35.4	18	208	4	110			79.6	42.7	1.2	7.4	3	4.4		67	216.8	10.76	1					11.8	89	1.09	1.09	27.5
70	Thrombotic cerebral infarction	2021.04.17	2304047	9	1	66	Yes	Yes	No	No	No	Yes	172	77	5	3.5	1.29	2.71318	210	10.4	12.1	0.22	29.3	10	23	24	67	2.4	274	62.9	39.6	1.7	8.2	2.4	5.8		75	232.4	5.18	0	3.8	1.36	1.07	1.98	12.1	80	1.12	1.12	33
71	Thrombotic cerebral infarction	2021.04.18	2304442	4	1	60	Yes	Yes	Yes	No	No	Yes	170	102	5.9	3.4	2.12	1.60377	168	11.7	14.8	0.2	39	24	23	83	64	6.5	288	57.7	39.1	2.1	10.5	5	5.5		80	371.8	5.86	0	3.77	2.49	0.88	2.2	12.2	86	1.13	1.13	35.5
72	intracerebral hemorrhage	2021.04.20	2305447	1	2	62	Yes	No	Yes	Yes	Yes	No	154	72	6.2	5.1	0.88	5.79545	152	10.1	10.9	0.15	24.7	21	18	119	210			60.7	34.7	1.3	4.4	1.6	2.8		225	425.2	6.14	0	4.18	1.49			10.8	98	1	1	30.6
73	Intracerebral hemorrhage (non-traumatic)	2021.04.20	2306045	4	1	64	No	No	No	No	No	No	170	110	15.8	14.84	0.54	27.4815	224	11.8	14.8	0.26	39.7	17	21	8	91			74.7	46.1	1.6	65.2	6.2	59		82	252.2	7.58	1	3.8	0.92			10.2	109	0.94	0.94	31.6
74	Cerebral infarction	2021.04.20	2305687	4	2	75	No	No	Yes	Yes	No	Yes	165	87	11	8.21	2.44	3.36475	205	11.8	14.5	0.24	38.8	8	7	30	104	5.9	162	68.9	34.1	1	22.8	6.2	16.6		100	374	8.75	1	3.99	1.52	0.64	2.47	12	81	1.11	1.11	34.4
75	intracerebral hemorrhage	2021.04.23	2081759	4	1	68	No	No	No	No	No	No	148	98	10.2	9.46	0.52	18.1923	212	10.9	12.6	0.23	32.2	18	28	13	97			77.2	45	1.4	21.9	5.6	16.3		81	202.2	9.9	1	5	0.55			10.4	115	0.96	0.96	25.3
76	intracerebral hemorrhage	2021.04.23	2307908	1	1	67	No	No	Yes	No	No	No	185	113	11.8	10.4	1.17	8.88889	320	10.7	12.2	0.34	30	23	21	46	92			69.5	39.2	1.3	14	5.2	8.8		97	309.7	8.78	1					10.7	108	0.99	0.99	27.7
77	Basal ganglia hemorrhage	2021.04.24	2308212	1	1	80	Yes	Yes	No	No	No	No	159	91	8.1	6.58	1.12	5.875	145	12.1	17.3	0.18	43.1	18	48	71	95			68.9	37	1.2	10	4.6	5.4		66	192.3	6.03	0	3.19	0.69			11.3	97	1.05	1.05	28.9
78	Cerebral infarction	2021.04.25	2299785	2	1	72	Yes	No	No	No	No	Yes	111	62	7.5	4.12	2.54	1.62205	195	9.5	12.7	0.19	21.8	18	24	13	61	3.4	200	68.6	35.6	1.1	8.1	3.1	5		86	369.5	6.9	0	2.07	0.5	0.84	0.98	11.7	87	1.08	1.08	31.8
79	Cerebral infarction	2021.04.27	2141984	2	1	62	No	Yes	Yes	No	No	Yes	146	87	8.3	6.17	1.72	3.58721	171	12.5	18.6	0.21	44.8	34	22	29	88	4.8	282	71.1	44.3	1.7	21.1	5	16.1		87	431.7	5.27	0	4.48	2.63	0.78	2.61	10	126	0.93	0.93	33.8
80	Cerebral infarction	2021.04.28	2310795	4	1	65	Yes	Yes	Yes	No	No	Yes	182	96	6	4.48	1.32	3.39394	217	11.9	14.6	0.26	40.1	6	9	15	54	4.9	214	56.6	34.9	1.6	4.4	1.9	2.5		281	600.9	7.11	0					10.7	108	0.99	0.99	38
81	intracerebral hemorrhage	2021.05.01	2311718	7	1	70	No	No	Yes	Yes	No	Yes	165	81	8.6	7.38	1.08	6.83333	224	10.8	13	0.24	32.6	55	55	103	87			69.5	37.6	1.2	10.4	4.5	5.9		82	340.7	21.69	0					10.7	108	0.99	0.99	34.7
82	Basal ganglia infarction	2021.05.01	2311705	1	2	65	No	No	No	No	No	Yes	147	115	5.7	3.49	2.02	1.72772	224	12.2	16.1	0.27	42.2	1	15	14	73	11.3	167	76.6	42,9	1.3	8.2	3.3	4.9		57	329.8	4.43	0	5.36	1.16	1.31	3.87	11.4	95	1.06	1.06	32.4
83	Thrombotic cerebral infarction	2021.05.05	2312517	2	1	60	Yes	Yes	Yes	No	No	No	140	82	6.8	3.93	2.5	1.572	175	10.8	12.6	0.19	31.9	10	14	15	54	6.3	210	61.2	38.7	1.7	14	5.6	8.4		66	300.8	5.17	0	3,54	0.57	1.79	1.45	10.3	118	0.95	0.95	39.3
84	intracerebral hemorrhage	2021.05.06	2330570	0	1	74	No	No	Yes	No	No	Yes	140	90	7.1	4.82	1.8	2.67778	262	10.5	12.5	0.27	29.3	17	23	65	49			68.2	36.9	1.2	12.5	4.7	7.8		81	465.1	9.48	0					10.9	94	1.01	1.01	32.6
85	Brainstem infarction	2021.05.07	2314100	1	1	60	No	No	No	No	No	No	139	92	4.7	3.61	0.88	4.10227	273	11.1	13.5	0.3	34.9	22	21	41	89	9.8	224	77.3	47.5	1.6	11.4	6.2	5.2		70	340.3	4.18	0	2.94	0.67	1.23	1.7	10.6	111	0.98	0.98	34.8
86	Cerebral infarction	2021.05.09	2315363	8	1	64	Yes	Yes	Yes	No	No	Yes	149	100	10.9	8.28	1.99	4.1608	174	8.9	9.7	0.15	17.1	9	15	17	6.2			67.2	43.5	1.8	11.4	4.8	6.6		67	398.2	5.48	1	4.42	1.2	1.87	2.03	9.8	133	0.91	0.91	36.5
87	Intracerebral hemorrhage (non-traumatic)	2021.05.12	2270577	10	2	81	No	No	Yes	Yes	No	No	160	100	18	16.66	1.1	15.1455	264	10.9	12.9	0.29	33.1	14	22	32	125			80.2	42.4	1.1	7.1	2.7	4.4		66	320.2	10.43	1	6.13	1.04			11.3	90	1.05	1.05	33.3
88	Intracerebral hemorrhage (non-traumatic)	2021.05.13	2317901	1	1	63	No	No	Yes	No	No	No	150	100	12.3	10.3	1.72	5.98837	223	12.3	16.3	0.27	43.7	25	18	13	121			69.3	43.7	1.7	12.8	4.8	8		76	398	7.15	1	5.35	0.68			10.9	104	1.01	1.01	31.9
89	Cerebral infarction due to occlusion or stenosis of the cerebral artery	2021.05.16	2319531	3	1	67	Yes	Yes	No	No	No	Yes	139	72	5.5	3.49	1.84	1.89674	282	10.8	12.6	0.3	30.6	9	11	30	113	11.6	201	57.8	39.5	2.2	6.5	3.4	3.1		64	318.9	5.51	0	3,45	1.15	1.15	1.93	10.5	113	0.97	0.97	34.4
90	intracerebral hemorrhage	2021.05.17	2319700	0	1	62	No	Yes	No	No	No	No	153	80	7.7	5.81	1.33	4.36842	317	9.9	11.2	0.31	23.3	6	8	3	57			61.7	40.8	2	13.1	4.5	8.6		68	228.8	6.67	0					11.1	93	1.03	1.03	30.1
91	intracerebral hemorrhage	2021.05.21	2325497	2	1	67	Yes	Yes	Yes	No	No	No	155	90	11.9	8.85	2.26	3.91593	284	9.7	10.8	0.28	22.1	8	20	189	109			74.4	40.6	1.2	18.9	6.2	12.7		102	571	5.2	1					11	102	1.02	1.02	31.6
92	Cerebral infarction	2021.05.24	2324771	6	2	68	No	No	No	No	No	No	170	65	14.8	12.44	2.12	5.86792	318	9.6	10.8	0.31	21	31	14	27	138	1.1	323	62.9	39.4	1.7	11.9	5.3	6.6		60	353.8	4.59	1	4.01	2.48	1.5	1.8	10	114	0.93	0.93	26
93	Cerebral infarction	2021.05.25	2325184	2	1	64	Yes	Yes	No	No	No	Yes	163	102	5.9	2.98	2.33	1.27897	23.5	11.5	14.3	0.27	37.8	25	18	41	138	6.4	253	65.3	41.7	1.8	12	5.2	6.8		72	282.3	11.94	0	12.3	1.06	1.21	2.94	10.5	113	0.97	0.97	38.4
94	Cerebral infarction	2021.05.25	2325301	1	2	69	No	No	Yes	No	No	Yes	152	81	8.2	5.85	1.98	2.95455	320	10.3	11.4	0.33	26.7	12	12	17	102	1.2	215	72.8	42.9	1.4	13.7	5	8.7		59	327.5	4.92	0	5.29	2.05	1.21	3.34	10.7	100	0.99	0.99	33.9
95	Right frontal, temporal, parietal, occipital lobes, and periventricular infarction	2021.05.25	2325494	14	1	78	No	No	No	No	Yes	Yes	181	93	3.5	2.38	0.86	2.76744	165	10.7	11.7	0.18	29	37	30	41	78			67.7	46	2.1	12.5	4.5	8		94	328	9.7	0	4.16	1.1	1.12	2.68	10.3	107	0.95	0.95	25.8
96	intracerebral hemorrhage	2021.05.26	2326151	4	1	66	No	No	Yes	No	No	No	165	95	6.4	3.71	2.3	1.61304	206	10.1	12.1	0.21	26	14	15	32	73			64.9	40.3	1.6	16.3	5	11.3		61	390.8	7.44						10.6	111	0.98	0.98	33.8
97	Intraventricular hemorrhage	2021.05.27	2326651	0	2	60	No	No	Yes	No	No	No	190	86	12.2	10.43	1.65	6.32121	315	9.5	10.4	0.3	20.2	14	22	61	88			82.2	46.1	1.3	6.7	3	3.7		62	231.3	6.4						10.9	104	1.01	1.01	30.2
98	Cerebral infarction due to embolism	2021.05.28	2326969	4	1	69	Yes	Yes	No	No	No	No	121	76	4.9	2.86	1.66	1.72289	235	11.2	14.2	0.26	34.6	22	13	25	89	4	218	66.7	43.7	1.9	8.8	4.5	4.3		63	521.8	5.59	0	2.63	1.27	0.28	1.23	10.5	103	0.97	0.97	33.1
99	Cerebral infarction	2021.05.28	2327057	3	1	65	No	No	No	No	No	Yes	136	75	8.7	6.21	2.05	3.02927	366	11.7	15.1	0.43	39	6	17	8	49			71.9	42.1	1.4	12.7	3.6	9.1		91	444.5	5.58	0	5.75	1.51	1.05	3.98	10.5	113	0.97	0.97	34.5
100	Thrombotic cerebral infarction	2021.05.28	2326774	5	1	72	Yes	Yes	Yes	No	No	Yes	172	89	9	5.89	2.57	2.29183	222	11.2	12.6	0.25	33.8	67	71	441	134	24.2	92	56.7	32.9	1.4	34.2	24.7	9.5	1.07	669	87.1	4.11	0	3.92	0.89	1.48	2.32	10.5	113	0.97	0.97	35.4
101	Cerebral infarction	2021.05.28	2326973	1	2	81	No	No	No	No	No	Yes	126	59	10.5	9.97	0.49	20.3469	141	12	14.6	0.17	41.6	13	17	15	109	0.8	148	68.5	44	1.8	11.7	5	6.7		42	177.4	5.65	1	4.76	1.06	1.38	2.8	10.8	98	1	1	32.7
102	Brainstem infarction	2021.05.29	2327435	9	2	67	No	No	Yes	No	No	Yes	173	115	15.8	14.53	0.99	14.6768	201	11.4	15	0.23	36.7	28	23	29	135			78.8	42.7	1.2	15.4	4.8	10.6		50	307.9	16.68	1	4.14	1.56	2.06	2.92	10.7	108	0.99	0.99	34.4
103	Left temporal, parietal, occipital lobes, periventricular regions, insula, and basal ganglia infarction	2021.05.30	2327796	8	2	67	No	No	Yes	No	No	Yes	145	90	9.9	8.24	1.01	8.15842	140	10.9	11.6	0.15	31.3	26	30	18	69			66.5	42.3	1.7	16.1	5.4	10.7		38	258.6	7.13	0	4.3	0.5	2.01	2.03	11.5	93	1.06	1.06	32.8
104	Cerebral infarction	2021.05.30	2327828	2	1	64	Yes	Yes	Yes	No	No	Yes	181	79	10.8	7.72	2.8	2.75714	238	10.8	12.7	0.26	30.6	14	10	300	126	1	255	67.8	45.3	2	12.1	5	7.1		76	439	7.67	0	3.22	1.02	0.96	1.97	10.6	111	0.98	0.98	30.6
105	Cerebral infarction	2021.05.30	2327825	3	2	67	No	No	No	No	Yes	Yes	151	84	13.5	10.73	2.29	4.68559	589	8.6	8.7	0.5	13.3	6	17	64	288	0.7	36	91.4	25.8	0.4	7.1	4.1	3		50	128.3	7.9	1	3.09	0.53	0.76	2.03	12.5	79	1.16	1.16	33.9
106	intracerebral hemorrhage	2021.05.31	2328686	7	1	64	No	No	Yes	No	No	No	150	95	5.6	4.24	0.88	4.81818	164					18	36	87	74			61.2	33.6	1.2	19.3	8.5	10.8		94	401	8.62	0					19.3	42	1.79	1.76	31.8
107	Intracerebral hemorrhage (non-traumatic)	2021.06.01	2329380	1	2	83	No	No	No	No	No	No	140	100	8	6.29	1.39	4.52518	197	11.4	13.4	0.22	35.1	8	16	5	75			72.4	42.5	1.4	29.3	5.6	23.7		52	206.1	5.5		4.32	1.08			11.3	97	1.05	1.05	36.5
108	Multiple cerebral infarctions	2021.06.01	2329073	8	1	71	No	No	Yes	No	No	Yes	173	86	6.4	4.55	1.6	2.84375	121	10.6	13.8	0.13	31.7	15	17	17	76	12.2	195	61.9	40.8	1.9	9	2.8	6.2		80	422.8	8.27	0	3.01	1.51	0.67	1.71	10.7	108	0.99	0.99	36.6
109	Cerebral infarction	2021.06.01	2329118	1	1	65	Yes	Yes	Yes	No	No	Yes	114	72	10.2	6.7	2.9	2.31034	294	11.1	13.5	0.33	34.2	16	12	72	62	2	265	60.3	38.7	1.8	19.1	7.8	11.3		72	268.2	19.55	1	2.81	2.53	0.74	1.09	11.3	97	1.05	1.05	33.7
110	Basal ganglia and periventricular infarction	2021.06.02	2329920	28	2	64	No	No	No	No	No	Yes	126	78	6.7	5.27	1.24	4.25	138	12	15.1	0.17	42.4	1	9	3	86			65.3	37.9	1.4	6.2	2.8	3.4		61	340.4	7.16	0	3.58	0.46	0.89	2.29	10.3	105	0.95	0.95	28.9
111	Brainstem infarction	2021.06.02	2329435	3	1	67	Yes	Yes	No	Yes	No	Yes	162	91	7.9	5.46	2.05	2.66341	128	12.5	17.2	0.16	44.9	18	24	43	100	8.7	206	65.2	42.2	1.8	9.3	3.2	6.1		108	467.1	6.63	0	3.92	2.47	0.83	2.19	10.7	108	0.99	0.99	35.3
112	Thrombotic cerebral infarction	2021.06.02	2329864	1	2	69	No	No	Yes	Yes	No	Yes	132	59	7.5	4.75	2.46	1.93089	151	12.2	15.2	0.18	44.1	9	10	15	98	9	176	62.7	40.6	1.8	10.9	3.6	7.3		59	213.7	4.93	0	3.17	1.86	0.66	1.55	11.2	91	1.04	1.04	32.1
113	Hemorrhagic transformation of cerebral infarction	2021.06.04	2331123	18	2	83	No	No	No	No	No	No	158	94	8.5	7.38	0.92	8.02174	114	12.2	15.6	0.091	34.6	4	18	14	95			70.5	41.4	1.4	11.3	4.3	7		72	326.4	8.32	0	3.62	0.72	0.84	2.43	12.3	78	1.14	1.13	26
114	Cerebral infarction due to occlusion or stenosis of the cerebral artery	2021.06.06	2331426	8	1	61	Yes	No	No	No	No	Yes	149	95	8	6.15	1.61	3.81988	228	9.4	10	0.22	19.3	14	18	5	98			77.2	43.7	1.3	8.9	2.9	6		81	337.8	5.69	0	3.43	1.1	0.88	2.12	11.4	88	1.06	1.06	34.5
115	Cerebral infarction due to occlusion or stenosis of the cerebral artery	2021.06.06	2331496	17	1	60	No	No	No	No	No	Yes	124	80	10	8.95	0.87	10.2874	205	9.9	11.3	0.2	23.5	20	25	55	114	1.2	251	82	45.1	1.2	9.9	3.9	6		119	693	10.19	1	4.05	0.99	1.18	2.32	11.2	91	1.04	1.04	33.6
116	Cerebral infarction	2021.06.07	2331724	4	1	67	Yes	No	No	No	No	Yes	156	101	8.1	6.71	1.03	6.51456	187	10.1	11.9	0.19	25.3	7	17	8	141			68.6	45.1	1.9	10.9	5.3	5.6		61	266.6	5.53	0	4.76	0.75	1.62	2.64	1.4	88	1.06	1.05	40.5
117	Infarction in the left frontal, temporal, parietal lobes, lateral ventricle, and occipital regions	2021.06.08	2332528	19	1	62	No	No	No	No	No	Yes	139	85	17.9	15.59	1.96	7.95408	211	10.2	11.5	0.22	26.6	4	26	27	72			66.6	39.5	1.5	26.7	6.7	20		91	421.1	7.45	1	3.99	0.7	0.96	2.5	11.3	90	1.05	1.04	36.1
118	Large infarction in the left hemisphere	2021.06.09	2333793	26	1	69	No	No	No	No	Yes	Yes	199	102	13.2	11.82	0.85	13.9059	164	11.1	13.8	0.18	35.4	3	20	3	64			58.3	36.3	1.7	12.4	5	7.4		136	434.7	8.44	1	5.06	0.86	1.32	3.3	11.2	90	1.04	1.04	28.6
119	Brainstem hemorrhage	2021.06.09	2333376	3	2	70	No	No	Yes	Yes	No	Yes	215	93	11.1	10.23	0.82	12.4756	316	12.8	16.3	0.4	46	10	15	7	76	0.7	197	75.8	42.9	1.3	9.4	3.4	6	0.84	72	221	21.71	1	6.41	1.61	1.45	4.08	10	110	0.93	0.93	34.9
120	Subarachnoid hemorrhage (SAH)	2021.06.11	2334289	10	2	70	No	No	No	No	No	No	128	78	10.7	9.82	0.79	12.4304	203	10.6	12.5	0.22	29.9	16	33	39	126			84.1	43.1	1.1	11	4.5	6.5		68	331.2	8.11	1					10.9	95	1.01	1.01	33.9
121	Epidural hematoma	2021.06.15	2336254	0	1	66	No	Yes	No	No	No	No	135	76	18.1	15.78	1.88	8.39362	234	9.8	10.9	0.23	22.9	17	35	13	52			70.4	42.7	1.5	19.8	5.9	13.9		64	575.1	6.33	1					10.4	103	0.96	0.96	34.3
122	intracerebral hemorrhage	2021.06.15	2336140	3	1	60	No	No	Yes	No	No	No	170	100	8.1	5.95	0.16	37.1875	137	12.2	16.8	0.17	44.3	5	16	15	69			79	48.4	1.6	27.6	6.7	20.9		96	420.9	2.51	0					10.6	100	0.98	0.98	40.4
123	intracerebral hemorrhage	2021.06.17	2337359	9	1	80	Yes	No	Yes	No	No	No	138	80	12.3	11.39	5.4	2.10926	142	12.2	15.6	0.17	41.5	9	17	8	70			72.3	43.7	1.5	16.1	6	10.1		101	465.2	9.03	1					11.6	86	1.07	1.07	26.5
124	Thrombotic cerebral infarction	2021.06.18	2338098	4	1	63	Yes	No	Yes	No	No	Yes	158	86	7.6	5.55	1.12	4.95536	248	11.3	13.2	0.28	35.3	26	32	80	229	12.8	245	62.5	39.7	1.7	5.8	2.4	3.4		72	418	5.48	0	4.67	1.15	1.35	2.87	10.2	106	0.94	0.94	35.4
125	intracerebral hemorrhage	2021.06.21	2338798	1	2	76	No	No	Yes	Yes	Yes	No	180	100	19.8	18.3	1.13	16.1947	157	10.6	13.3	0.17	28.4	11	19	5	113			82.8	47	1.3	8.5	4.9	3.6		69	289.2	11.17	1					11.9	83	1.1	1.1	29.8
126	intracerebral hemorrhage	2021.06.24	2341387	0	1	67	No	No	Yes	No	No	Yes	155	100	7.9	5.94	1.7	3.49412	190	11.1	13.7	0.21	34.1	14	18	21	67			63.1	40.4	1.8	33	7.4	25.6		98	704	5.9	0					11	92	1.02	1.02	42.7
127	Intracerebral hemorrhage (non-traumatic)	2021.06.29	2343894	9	2	60	No	No	No	No	No	No	200	110	20.2	18.65	1.34	13.9179	294	10.1	11.7	0.3	26.2	12	25	6	149			86.6	47.5	1.2	9.4	3.3	6.1		102	524.5	8.25	1					11.2	90	1.04	1.04	29.7
128	intracerebral hemorrhage	2021.07.01	2344856	18	2	72	No	No	Yes	Yes	No	Yes	129	79	11.5	10.3	0.95	10.8421	199	11.6	14.1	0.23	38.2	6	19	63	61			69.6	38.4	1.2	5.1	3.1	2		163	433.7	11.01	1					10.2	106	0.94	0.95	35.2
129	Non-traumatic basal ganglia hemorrhage	2021.07.01	2345370	2	1	63	No	No	No	No	No	No	140	100	7.4	4.65	2.22	2.09459	230	10.1	11.3	0.23	25.8	46	45	21	68			62.3	39.8	1.8	10.5	3.6	6.9		87	319.4	6.25	0					10.7	98	0.99	0.99	35.1
130	intracerebral hemorrhage	2021.07.02	2345883	11	2	65	No	No	No	Yes	No	Yes	129	85	7.3	6.38	0.64	9.96875	190	11.5	13.2	0.22	36.8	17	24	5	65			70.2	44.3	1.7	15.6	4.9	10.7		65	416.9	7.16	0					10.9	95	1.01	1.01	37.9
131	intracerebral hemorrhage	2021.07.10	2350258	8	1	65	Yes	Yes	Yes	No	No	No	210	160	6.6	5.03	1.46	3.44521	268	10.2	11.8	0.2	25.6	8	23	67	137			79.7	44	1.2	32.6	9.9	22.7		68	373.7	5.52	0					10.7	96	0.99	0.99	60
132	Subarachnoid hemorrhage (SAH)	2021.07.15	2353666	0	1	64	No	Yes	Yes	No	No	No	190	110	8	5.41	2.18	2.48165	206	12.1	16	0.25	42.3	17	24	42	57			73	44.3	1.5	14.4	3.9	10.5		72	502.5	8.29	0					10.9	95	1.01	1.01	37.9
133	large-scale cerebral infarction	2021.07.16	2354015	16	1	68	No	No	Yes	No	Yes	Yes	168	102	18	16.1	0.6	26.8333	230	8.8	15.5	0.202	37.8	12	22	2	79	1.7	224	75.3	45.6	1.5	19.6	6.5	13.1	0.8	67	244.9	7.73	1	3.1	0.49	1.15	1.98	12	81	1.11	1.11	37.2
134	Intracerebral hemorrhage (non-traumatic)	2021.07.18	2354851	16	1	61	No	No	Yes	No	No	No	140	100	10.5	9.8	0.65	15.0769	160	11.3	13.3	0.18	35.2	7	17	11	101			73.6	47.4	1.8	11.1	4.3	6.8		99	284.4	8.51	1					12.1	80	1.12	1.12	29.4
135	Acute cerebral infarction	2021.07.22	2351442	3	2	66	No	No	Yes	Yes	No	No	140	90	7.6	5.03	2.07	2.42995	237	12	14.5	0.28	41.3	20	26	40	147			79.6	48.3	1.5	16.6	5.7	10.9		49		11.81	0	3.44	1.3	1.04	2.06	10.6	100	0.98	0.98	34.5
136	Cerebral infarction	2021.08.01	2362473	13	1	77	No	No	Yes	No	No	Yes	163	89	10.6	8.4	1.48	5.67568	175	10.9	13.3	0.19	30	8	22	26	76			78	46	1.4	14.1	5.1	9	1.31	104	466.2	8.73	1					11.6	86	1.07	1.07	36.2
137	Cerebral infarction	2021.08.01	2362449	4	1	73	No	No	Yes	Yes	No	Yes	160	87	4.9	2.89	1.07	2.70093	123	10	10.6	0.12	24.5	8	18	3	52			74.5	42.1	1.3	11.4	5.2	6.2		75	388.4	6.91	0	3.88	0.82	1.09	2.59	12.2	79	1.13	1.13	33.9
138	Cerebral infarction due to embolism	2021.08.01	2362580	6	2	80	No	No	No	No	No	Yes	147	87	5.1	3.03	1.83	1.65574	185	13.5	18.8	0.25	53.8	17	24	9	103			71.9	40	1.3	6.6	2.9	3.7		67	303.8	9.68	0	3.44	0.81	0.94	2.16	10.7	98	0.99	0.99	31.2
139	Cerebral infarction	2021.08.01	2362464	3	1	62	No	No	No	No	No	Yes	141	99	9.5	6.82	2.09	3.26316	243	8.7	8.6	0.21	14.7	9	18	20	60			79.1	44.4	1.3	12.5	4.7	7.8		90	565.2	5.65	0					11.1	9.2	1.03	1.03	38.7
140	Cerebral infarction	2021.08.01	2362308	16	1	62	No	Yes	Yes	No	No	Yes	160	92	5.9	3.84	1.66	2.31325	151	11	12.5	0.17	31.7	39	44	109	105			82.3	42.3	1.1	28.4	10	18.4		67	491.3	8.04	0	3.86	1.19	0.84	2.66	12.1	80	1.12	1.12	33.1
141	Cerebral infarction	2021.08.02	2363371	2	2	70	No	No	No	Yes	No	Yes	134	78	7	3.97	2.5	1.588	268	11.3	14.6	0.3	37.1	16	18	33	139	5.7	270	77.8	45.9	1.4	16.7	4.1	12.6		74	341.7	7.11	0	6.12	2.18	1.23	3.94	10.4	103	0.96	0.96	34.5
142	Thrombotic cerebral infarction	2021.08.03	2364061	0	2	69	Yes	Yes	No	No	No	Yes	130	80	6.9	4.6	1.9	2.42105	263	9	16	0.236		12	20	17	66	0.7	281	72.7	42.6	1.4	15.1	5.2	9.9	0.97	65	279.8	5.41	0	5.61	1.67	1.12	3.57	10	110	0.93	0.93	29.5
143	Thrombotic cerebral infarction	2021.08.03	2364050	4	2	70	No	No	Yes	Yes	No	Yes	191	102	10.2	8.51	1.45	5.86897	175	13	18	0.23	49.3	8	17	8	79			75.6	46	1.6	12	2.8	9.2		56	254.1	14.2	1	5.54	2.15	0.91	3.55	9.5	121	0.88	0.88	35.9
144	Thrombotic cerebral infarction	2021.08.04	2364591	3	2	63	Yes	No	No	No	No	Yes	135	91	17.5	14.41	2.56	5.62891	344	9.5	10.1	0.33	21.2	10	14	31	121			82	41.2	1	4	2	2		49	373.8	9.2	1	5.49	1.13	0.7	4.35	11.8	84	1.09	1.09	34.2
145	Cerebral infarction	2021.08.05	2365080	11	1	69	Yes	No	No	Yes	No	No	179	104	10.2	9.27	0.78	11.8846	192	10.6	11.7	0.2	27.8	9	20	13	67	14.4	203	70.6	39.5	1.3	8.3	3.7	4.6		61	303.3	10.98	1	3.81	0.92	0.87	2.48	10.7	98	0.99	0.99	33.2
146	Left frontal lobe infarction	2021.08.06	2365535	2	1	71	Yes	Yes	No	No	No	Yes	156	98	10.9	8.54	1.98	4.31313	153	11.6	14.9	0.18	38	12	18	121	74	3.4	215	62.1	41	1.9	29.1	11.7	17.4		102	394.2	15.19	1	4.97	0.97	1.32	3.26	11.8	84	1.09	1.09	42.5
147	Cerebral infarction	2021.08.06	2365359	2	1	68	No	No	No	No	No	Yes	124	83	6.5	4.23	1.54	2.74675	245	9.8	11.1	0.24	23.4	17	22	104	81			67	42	1.7	16.6	5.4	11.2		95	365.5	5.49	0	3.51	1.44	1.11	1.8	11.3	90	1.05	1.04	35.3
148	Intracerebral hemorrhage (non-traumatic)	2021.08.08	2366047	1	1	69	No	No	No	No	No	No	140	100	7.8	4.67	2.39	1.95397	217	11.2	13.5	0.24	34.1	8	21	111	63			74.5	42.8	1.4	7.9	3.9	4		98	518.5	5.56	0					10	110	0.93	0.93	30
149	Cerebral infarction	2021.08.08	2365821	2	2	60	No	No	Yes	No	No	Yes	194	101	6.7	3.81	2.2	1.73182	180	9.3	9.7	0.17	20	15	19	12	74			80	45.6	1.3	8.2	2.7	5.5		58	512.8	6.92	0	4.12	0.67	1.05	2.77	10.6	98	0.98	0.98	36.1
150	Multiple cerebral infarctions	2021.08.11	2368013	5	1	60	Yes	No	No	No	No	Yes	115	75	16.9	16.08	0.74	21.7297	215	11.3	15	0.24	36.9	17	25	25	79	2	268	74.9	46.4	1.6	6.2	4.4	1.8		86	312.6	8.91	1	4.24	0.72	1.3	2.68	12.3	78	1.14	1.13	27.4
151	Intracerebral hemorrhage (non-traumatic)	2021.08.12	2368067	1	1	69	No	No	Yes	No	No	No	140	100	8	5.55	1.96	2.83163	215	11.3	13.5	0.24	35.6	19	27	183	77			72.7	39.5	1.2	17.3	6.1	11.2		72	397.7	6.94	0					9.7	116	0.9	0.9	42.4
152	Intracerebral hemorrhage (non-traumatic)	2021.08.13	2368588	5	1	62	No	No	No	No	No	No	220	110	14	12.96	0.64	20.25	164	11.7	14.9	0.19	37.9	4	18	18	62			85.1	49.6	1.4	25.9	7.1	18.8		131	331.9	12.51	1					10.4	103	0.96	0.96	41.2
153	Brainstem infarction	2021.08.17	2212299	2	1	84	No	No	Yes	No	No	Yes	170	89	6.8	4.89	24.1	0.202905	150	9.9	11.3	0.15	23.9	7	12	6	75			69.5	40.1	1.4	8.8	3.2	5.6		91	519.6	5	0	4.23	0.79	0.85	3.09	10.4	103	0.96	0.96	30.7
154	Cerebral infarction	2021.08.17	2370594	5	1	62	Yes	Yes	Yes	No	No	No	159	109	9.1	6.7	2.12	3.16038	194	11.1	12.8	0.21	33.8	28	22	79	67	10.1	349	61.3	39.7	1.8	29.4	7.9	21.5		40	398.9	3.91	0	5.52	1.48	0.91	3.93	10.4	103	0.96	0.96	42.6
155	Cerebellar infarction	2021.08.18	2371399	2	1	72	Yes	No	Yes	No	No	Yes	130	82	7.1	4.81	2.01	2.39303	178	10.7	12.7	0.19	30.2	15	18	22	57	1.2	233	65.5	40.4	1.6	19.2	5.6	13.6		102	454.7	6.82	0	4.42	2.37	1	2.94	10.7	96	0.99	0.99	32
156	Cerebral infarction	2021.08.19	2372007	2	1	62	Yes	Yes	Yes	No	No	Yes	177	110	5.6	3.89	1.5	2.59333	137	12.3	15.9	0.17	45.2	25	15	82	36	4.3	88	33.6	20.2	1.5	10.4	4.4	6		73	466.4	9.03	0	1.62	1.41	0.72	0.74	10	110	0.93	0.93	29.1
157	Cerebral infarction due to occlusion or stenosis of the cerebral artery	2021.08.21	2372651	9	1	63	Yes	No	Yes	No	No	Yes	151	89	11.4	7.85	3.03	2.59076	262	9.8	11.1	0.26	22.8	89	33	140	63	6.6	358	66.3	42.4	1.8	16.2	5.5	10.7		68	504.1	6.78	1	6.52	1.8	1.67	4.36	10.3	105	0.95	0.96	24.3
158	Multiple cerebral infarctions	2021.08.21	2372633	7	2	71	Yes	Yes	Yes	No	Yes	Yes	185	94	7	4.83	1.85	2.61081	206	10.9	12.5	0.22	31.9	115	17	26	70	0.8	224	68.2	45.3	2	24	6.2	17.8		50	256.5	6.27	0	5.5	2.75	0.84	3.62	11.1	92	1.03	1.03	35.7
159	Cerebral infarction	2021.08.22	2372958	3	1	61	Yes	Yes	Yes	No	Yes	Yes	165	103	5	3.26	1.13	2.88496	153	10.7	13.2	0.16	31.2	13	13	10	46	3.4	220	59.1	36.8	1.7	14.7	4.8	9.9		79	463.6	5.01	0	4.05	0.9	0.88	2.82	10.5	101	0.97	0.97	34.8
160	Cerebral infarction	2021.08.26	2371612	0	1	83	No	No	No	No	No	Yes	112	80	9.1	7.69	1.11	6.92793	305	11.9	16.3	0.36	41.8	15	25	36	77			74.3	45	1.5	24	6.5	17.5		107	539.5	4.38		3.08	0.99	0.89	1.63	12.4	77	1.15	1.14	48
161	Intracerebral hemorrhage (non-traumatic)	2021.08.28	2376139	1	1	78	No	No	No	No	No	No	140	100	7.2	5.01	1.65	3.03636	211	11	12.9	0.23	32.5	7	15	5	81			72.7	37.9	1.1	13	2	11		68	172	6.82	0					10.8	95	1	1	33.4
162	Intracerebral hemorrhage (non-traumatic)	2021.09.05	2380116	14	2	71	No	No	No	No	No	No	140	92	17	16.12	0.76	21.2105	213	8.7	9.7	0.19	14.6	16	19	20	103			82.9	45.4	1.2	8	2.7	5.3		76	406.1	9.34	1					10.9	95	1.01	1.01	38.3
163	Intracerebral hemorrhage (non-traumatic)	2021.09.13	2384099	16	1	74	No	No	Yes	No	No	No	170	90	17	14.82	1.93	7.67876	181	13.3	19	0.24	50.1	65	49	100	111			72.3	45.5	1.7	12.9	3.9	9		89	406.2	17.64	1					10.8	96	1	1	37.2
164	Left temporal lobe infarction	2021.09.24	2389397	16	1	61	Yes	Yes	Yes	Yes	No	No	126	78	8.2	7.15	0.84	8.5119	252	10	10.8	0.25	23.7	12	13	12	85	2.8	207	59.5	40.5	2.1	9.3	4.4	4.9	0.75	57	121.6	6.15	0	4.05	0.67	1.03	2.87	11.7	85	1.08	1.08	35.3
165	Intracerebral hemorrhage (non-traumatic)	2021.09.25	2389612	12	2	67	No	No	No	No	No	No	120	70	23.6	21.74	1.27	17.1181	213	11	13.4	0.23	34.3	7	25	1	116			77.5	42.8	1.2	34.7	9.3	25.4		87	185.4	5.6	1					11.1	91	1.03	1.03	29.8
166	Cerebral infarction	2021.09.27	2390181	1	1	73	No	No	Yes	No	No	No	140	86	3.7	2.51	1.03	2.43689	195	9.1	9.6	0.18	16.6	16	18	15	70	11.1	260	68.7	47.8	2.3	13	5.6	7.4		66	289.4	5.95	0	4.22	0.72	1.17	3.09	11.1	92	1.03	1.03	32.6
167	Brainstem infarction	2021.09.29	2388975	9	1	73	No	Yes	No	No	No	Yes	151	96	10	8.69	0.94	9.24468	238	10.8	13.1	0.26	31.3	10	19	1	106			70	32.5	0.9	13.2	5.7	7.5		55	192.1	4.97	0	3.44	0.91	0.99	1.94	11.5	86	1.06	1.06	33.9
168	Cerebral infarction	2021.09.30	2390809	24	2	76	No	No	Yes	No	No	Yes	138	74	17.6	16.35	0.72	22.7083	219	9.9	11.3	0.22	23.8	22	41	12	73			66.8	41.4	1.6	8.2	2.6	5.6		140	402.1	7.98	1					14.3	62	1.32	1.31	41.2
169	Cerebral infarction	2021.09.30	1997125	4	1	68	Yes	No	Yes	No	Yes	Yes	180	113	11.3	9.43	1.66	5.68072	251	11.1	13.7	0.28	33.8	34	16	26	90	9.4	115	75.2	43.9	1.4	11.1	3.6	7.5	1.04	64	162	17.54	1	4.25	2.34	0.82	2.75	9.4	120	0.87	0.87	32.2
170	Cerebral infarction due to cerebral artery occlusion	2021.10.02	2391034	9	1	72	Yes	Yes	No	No	No	Yes	178	101	10.7	8.5	0.7	12.1429	142	12.2	16.8	0.172		35	109	155	155	32.3	53	64.8	33.6	1.1	46.8	21.4	25.4	1.12	72	74		1	3.12	0.7	1.07	1.67	14.4	62	1.33	1.33	37.6
171	Cerebral infarction	2021.10.03	2391219	4	1	66	No	Yes	Yes	Yes	No	Yes	138	81	6.8	5.15	1.58	3.25949	169	10.6	12.3	0.18	29.2	19	16	29	80	2	242	65.6	39.2	1.5	22.3	6.7	15.6		78	355.4	13.85	0	3.95	2.33	0.95	2.25	11.2	91	1.04	1.04	30.9
172	Cerebral infarction	2021.10.04	2391401	2	1	65	Yes	No	No	No	No	Yes	141	79	6.1	3.05	2.52	1.21032	304	10	11.6	0.31	24.2	14	14	19	69	4.5	219	63.1	40.9	1.8	9	3.4	5.6		89	322	6.25	0	4.28	1.33	0.74	3.14	10.9	95	1.01	1.01	35.6
173	Acute cerebral infarction in the left basal ganglia and parietal lobe	2021.10.05	2391577	17	1	63	Yes	Yes	Yes	Yes	No	Yes	145	85	7.7	5.7	1.2	4.75	173	11.3	18	0.194		89	62	339	327	20.3	93	55.4	33.5	1.5	9.5	7.9	1.6	0.77	62	155.2	8.7	0	2.57	1.82	0.5	1.54	12.7	75	1.18	1.177	27.7
174	large-scale cerebral infarction	2021.10.05	2391517	12	2	64	Yes	No	Yes	No	Yes	Yes	211	91	13	11.96	0.91	13.1429	253	11.5	14.5	0.29	37.1	15	15	32	76			78.5	47.1	1.5	12.9	3.4	9.5		51	111.6	11.5	1	5.86	1.68	1.36	4.02	10.6	98	0.98	0.98	21.7
175	Cerebral infarction	2021.10.07	2392021	2	2	88	Yes	Yes	No	No	No	No	141	84	9.6	8.75	0.51	17.1569	309	9.9	10.5	0.3	22.2	11	14	10	64	4.9	152	76	37.8	1	7.9	3.5	4.4		71	327.5	8.02	0	4.83	1.11	0.97	3.45	11.2	91	1.04	1.04	31.6
176	Left frontoparietal lobe, basal ganglia, and insular infarction	2021.10.10	2393035	11	1	82	No	No	No	Yes	No	Yes	150	83	6	4.57	1.14	4.00877	113	11.1	12.8	0.13	34.6	21	17	28	23.4	1.8	156	1.8	74.8	113	47.9	31.3	7.9	0.96	52	80.9	9.05	0	3.47	1.22	0.6	2.49	11.9	82	1.1	1.1	31.3
177	Left basal ganglia infarction	2021.10.11	2392190	5	2	65	Yes	No	No	Yes	No	Yes	158	87	9	5.02	3.21	1.56386	308	10.3	12.4	0.32	27.6	14	28	11.9	114	11.9	110	68.3	42.6	1.7	5.7	2.2	3.5		74	215.7	18	0	5.65	6.37	0.9	2.84	13.3	69	1.23	1.22	29.4
178	Cerebral infarction	2021.10.30	2402665	2	2	63	Yes	No	Yes	No	No	No	145	88	6.4	3.61	2.58	1.39922	343	10.4	11.6	0.36	27.6	12	13	33	64	4.4	24.2	67.4	42.2	1.7	4.9	1.9	3	1.21	79	589	8.71	0	5.85	3.36	0.92	3.42	11.1	92	1.03	1.03	31.5
179	Intracerebral hemorrhage (non-traumatic)	2021.10.31	2402922	10	2	77	No	No	Yes	No	Yes	Yes	159	95	11.8	10.65	0.7	15.2143	200	11.6	14.4	0.23	38.6	10	19	9	76			69.5	42.1	1.5	21.4	6.4	15		79	242.1	7.64	1					11.3	88	1.05	1.04	26.4
180	Hemorrhagic cerebral infarction	2021.11.06	2405361	1	2	61	No	No	No	No	No	No	150	90	8.8	7.41	1.23	6.02439	182	11.2	14.1	0.2	34.8	10	57	9	105			67.9	39.8	1.4	17.5	5.9	11.6		42	274	5.07	0					12	81	1.11	1.11	34.4
181	Cerebral infarction	2021.11.07	2405696	1	2	77	No	No	Yes	Yes	Yes	Yes	154	105	9.1	7.26	1.56	4.65385	339	11.9	14.7	0.4	40.4	17	17	65	100			76.9	41.2	1.2	8.4	3.5	4.9		99	222.9	6.82	0	4.75	1.06	1.31	3.49	11.3	88	1.05	1.04	33.5
182	Intracerebral hemorrhage (non-traumatic)	2021.11.10	2406645	9	1	69	No	No	Yes	No	No	No	152	86	8.1	7.33	0.42	17.4524	122	13.5	21	0.16	52.2	9	20	12	76			75.4	43.3	1.3	30.4	6.8	23.6		42	357.1	5.55	0					11.1	92	1.03	1.03	30.1
183	Intracerebral hemorrhage (non-traumatic)	2021.11.22	2412120	10	1	68	No	No	No	No	No	No	130	90	9.2	7.58	1.4	5.41429	184	11.6	14.3	0.21	38.2	16	19	55	55			75.8	49	1.8	6.6	3.8	2.8		57	269.2	7.2	0					10.9	94	1.01	1.01	30.5
184	Basal ganglia infarction	2021.11.23	2412151	2	1	61	No	Yes	Yes	No	No	No	125	85	18.5	16.11	1.6	10.0687	265	9.1	9.7	0.24	18.8	24	24	43	76	5	210	75.8	44.2	1.4	5.8	2.9	2.9		88	283.8	8.03	1	4.5	1.07	1.34	3.1	9.9	110	0.92	0.92	27.1
185	Thrombotic cerebral infarction	2021.11.23	2412683	3	1	69	Yes	Yes	Yes	No	No	Yes	172	100	6.1	4.51	1.42	3.17606	242	11.3	14.1	0.27	36.4	11	13	31	89	4.8	192	70.9	45.7	1.8	25.8	9.2	16.6		98	257.3	5.6	0	3.86	1.32	0.76	3.01	11.2	90	1.04	1.04	37.8
186	Thrombotic cerebral infarction	2021.12.06	2418241	3	2	70	No	No	Yes	Yes	Yes	Yes	150	77	5.5	4.42	0.95	4.65263	140	10.7	17.2	0.149	42.1	9	13	75	75	4.9	113	62.9	35.8	1.3	7.5	3.4	4.1	2.28	236	233	9.28	0	4.61	1.41	0.83	3.12	12.1	80	1.12	1.12	28
187	Thrombotic cerebral infarction	2021.12.07	2418482	4	1	66	Yes	Yes	Yes	No	No	Yes	180	90	7.6	5.58	1.63	3.42331	244	11.2	13.3	0.27	36	12	13	38	101	1.4	225	56.1	32.7	1.4	9.6	4.1	5.5		73	212.8	4.82	0	3.32	0.62	1.33	1.87	10.5	101	0.97	0.97	39.7
188	Cerebral infarction	2021.12.10	2418992	1	1	62	Yes	Yes	No	Yes	No	No	146	108	7.8	4.54	2.84	1.59859	214	12.7	16.5	0.27	47.4	13	13	19	99	4.1	214	4.1	39.6	1.5	8.2	3.1	5.1		77	322.5	7.86	0	3.24	1.46	0.79	2.16	10	111	0.93	0.93	32.9
189	Left frontal lobe infarction	2021.12.10	2418979	14	1	66	Yes	Yes	Yes	Yes	No	Yes	159	82	9.8	8.04	1.48	5.43243	273	11.6	14	0.32	38.3	23	13	18	77			66.7	38.4	1.4	23.1	4.2	18.9		65	338.1	6.61	0					10.6	100	0.98	0.98	32
190	Thrombotic cerebral infarction	2021.12.14	2419624	12	2	65	Yes	No	No	No	No	Yes	155	87	6.4	5.11	1.19	4.29412	252	11.1	13.8	0.28	33.6	14	20	13	127	9	235	75.3	46	1.6	7.3	2.8	4.5	1.07	77	259	6.97	0	5.89	1.92	2.22	3.78	9.9	113	0.92	0.92	33.2
191	large-scale cerebral infarction	2021.12.17	2420594	16	2	68	No	No	No	No	No	是	177	109	10.8	8.5	1.95	4.35897	310	10.1	11.9	0.31	26.1	17	16	17	121			75.9	47.9	1.7	14.2	3.3	10.9	0.6	51	193	14.1	1	6.23	2.33	1.12	4.5	11.3	89	1.05	1.05	30.4
192	Thrombotic cerebral infarction	2021.12.18	2420826	2	1	78	Yes	Yes	No	No	No	Yes	149	77	11.6	8.65	2.53	3.41897	218	10.7	12.6	0.23	30.4	11	15	67	82	6	300	6	37.8	1.4	10	4.2	5.8		52	199	5.92	1	4.53	1.18	1.25	3.39	9.5	122	0.88	0.88	30.3
193	Thrombotic cerebral infarction	2021.12.19	2420978	3	1	70	Yes	Yes	Yes	No	No	No	153	88	9.9	8.65	1.01	8.56436	235	10.4	11.6	0.24	27.5	24	15	20	64	11.7	178	70.9	41.1	1.4	16.9	4.4	12.5	0.84	78	139		1					12.6	75	1.17	1.17	37.4
194	large-scale cerebral infarction	2021.12.21	2422011	9	1	65	Yes	No	Yes	Yes	No	No	149	87	10.3	9.01	1.04	8.66346	209	11.1	13.3	0.23	34.7	16	13	20	70			75.3	42.5	1.3	6	3.3	2.7	0.93	65	332	12.03	1	5.4	1.03	1.43	3.96	10	111	0.93	0.93	37.3
195	Cerebral infarction	2022.01.05	2428639	2	1	60	Yes	No	Yes	No	No	Yes	122	83	8.5	6.12	2	3.06	208	11.8	14.6	0.24	40.2	16	13	17	81	3.5	219	54.1	37.2	2.2	8.1	3.1	5		86	389.6	4.89	0	2.9	1	0.78	1.81	10.8	95	1	1	31.1
196	Stroke	2022.01.05	2418682	3	1	66	Yes	Yes	No	No	No	No	134	82	7.9	3.86	3.62	1.0663	211	11.2	13.2	0.24	33.6	31	28	94	56	8.5	273	63.5	43.8	2.2	14.7	4.4	10.3		85	415.4	6.78	0	5.73	2，46	0.87	4.03	10.7	98	0.99	0.99	36
197	Cerebral infarction	2022.01.05	2428060	7	1	74	No	No	Yes	Yes	No	Yes	135	84	0.56	3.87	1.42	2.72535	195	11	13	0.21	32.9	18	19	33	79	2.2	267	72.8	42.6	1.4	10.2	3.9	6.3		114	293.3	6.93	0	5.57	1.94	0.94	4.04	11.1	92	1.03	1.03	36.3
198	Intracerebral hemorrhage (non-traumatic)	2022.01.07	2155468	2	1	62	No	No	Yes	No	No	No	145	95	8.7	6.86	1.75	3.92	156	11.1	13.9	0.17	34.5	32	26	23	68			78.7	41.3	1.1	27.5	6.1	21.4		113	363.9	7.34						11.9	82	1.1	1.1	30.2
199	Cerebral infarction	2022.01.07	2430008	5	2	69	No	No	No	No	No	Yes	127	75	5.4	3.23	1.79	1.80447	213	11.6	14.1	0.25	38.5	9	13	7	104	1.8	217	58.5	36	1.6	15.1	4.6	10.5		62	182.7	8.79	0	4.3	1.26	0.82	3.11	11.6	85	1.07	1.07	39.5
200	Cerebral infarction	2022.01.11	2432327	1	2	63	No	No	Yes	Yes	Yes	Yes	130	81	8.9	5.99	2.56	2.33984	291	11.7	15.6	0.34	30.1	31	15	48	112			89.9	53.3	1.5	13.7	4.2	9.5		75	223.6	19.08		5.42	2.02	1.33	3.42	10.4	103	0.96	0.96	37.4
201	Thrombotic cerebral infarction	2022.01.11	2229361	1	2	60	No	No	Yes	No	No	No	129	99	7.2	5.24	1.83	2.86339	238	10.7	12	0.26	29.9	13	13	24	53	13.5	232	62.5	40.9	1.9	7.4	2.7	4.7		71	181	4.97	0	4.83	1.11	1.11	3.38	11.6	85	1.07	1.07	35
202	Cerebral infarction	2022.01.11	2432217	16	1	75	No	No	Yes	No	No	Yes	161	99	12.1	10.15	1.63	6.22699	155	11.3	14.4	0.18	36.5	12	17	17	89	2.2	143	75.3	48.1	1.8	27.6	7.6	20		83	265.6	5.03	1	5.27	1.27	0.97	4.09	11.9	82	1.1	1.1	30.9
203	Intracerebral hemorrhage (non-traumatic)	2022.01.12	2432775	11	1	60	No	No	Yes	No	No	No	185	125	11.9	10.32	1.27	8.12598	174	12.5	16.4	0.22	45.3	49	27	172	67			75.5	39.5	1.1	51.9	11.2	40.7		69	297	6.64	1					12.3	78	1.14	1.14	34.9
204	Thrombotic cerebral infarction	2022.01.13	2433646	4	2	64	Yes	Yes	Yes	No	Yes	Yes	166	92	8	4.95	2.19	2.26027	157	10.9	12.5	0.17	32.1	27	23	17	94			75.4	39.9	1.1	6.9	2	4.9		73	487.2	5.7	0	4.35	1.61	0.89	2.94	9.7	114	0.9	0.9	34.4
205	Thrombotic cerebral infarction	2022.01.13	2433571	9	1	63	Yes	Yes	No	No	No	Yes	129	88	9.6	7.06	2.11	3.34597	215	11.5	14.2	0.25	37.4	18	18	17	70	0.7	174	69.4	42.7	1.6	26.1	11.1	15		71	238.3	15.78	0	4.11	1.92	0.9	2.53	10.8	95	1	1	27.2
206	Thrombotic cerebral infarction	2022.01.14	2434083	3	1	65	No	No	No	No	No	Yes	140	95	9.9	8.75	0.94	9.30851	214	11.1	13.6	0.24	34.1	13	18	29	72	4.7	285	70.2	46.6	2	15.9	5.8	10.1		62	171.6	6.33	0	4.13	0.59	1.08	2.75	10.5	100	0.97	0.97	34.7
207	Thrombotic cerebral infarction	2022.01.14	2433741	7	1	74	Yes	Yes	No	No	No	Yes	170	97	9.7	6.6	2.5	2.64	220	8.6	16.9	0.19		43	28	48	99	4.8	297	82.4	50.2	1.6	15	6	9	1.43	91	419.6	5.81	0	3.14	1.33	0.99	1.65	12.5	76	1.16	1.16	32.1
208	Thrombotic cerebral infarction	2022.01.20	2437056	4	1	68	Yes	No	No	No	No	No	143	87	6.8	3.52	3	1.17333	196	12.3	15.3	0.24	42.9	16	15	25	67	4.2	197	57.6	37.4	1.9	15.3	4.7	10.6		65	252.1	4.85	0	2.77	0.62	0.6	2.2	11.2	91	1.04	1.04	42.6
209	Thrombotic cerebral infarction	2022.01.21	2437181	4	1	80	Yes	Yes	Yes	No	No	Yes	167	83	6.5	5.15	1.12	4.59821	189	12	14.3	0.23	41	16	18	13	100	7.6	218	68.7	44.9	1.9	10.3	3.1	7.2	1.43	123	397.7	5.63	0	4.54	0.77	1.16	3.07	11.7	84	1.08	1.08	37.3
210	Thrombotic cerebral infarction	2022.01.27	2130812	1	1	62	Yes	No	No	No	No	No	157	84	8.5	5.74	2.41	2.38174	291	11	13.5	0.32	31.8	29	25	45	105	2.4	241	68.8	43.9	1.8	10.2	2.9	7.3		67	232.5	13.93	0	6.54	1.44	1.4	1.25	10.2	107	0.94	0.94	32
211	Cerebral infarction due to embolism	2022.01.31	2439613	7	1	66	Yes	Yes	Yes	No	No	Yes	159	93	9.9	6.78	2.81	2.41281	194	12	13.7	0.23	38.6	28	32	53	97	4.4	141	78.1	43.3	1.2	16.3	10	6.3	0.99	35	77.3	4.89	0	5.38	1.5	1.45	3.44	13.6	67	1.26	1.25	29.5
212	Cerebral infarction due to embolism	2022.02.01	2438861	14	2	63	Yes	Yes	Yes	No	Yes	Yes	174	90	8.2	19.6	1.61	12.1739	255	10.2	11.9	10.2	25.7	51	33	127	141	2.1	170	89.3	48.5	1.2	15.3	5.3	10	1.67	107	14.88	9.76	1	8.64	2.2	1.07	2.93	21.8	35	2.02	2.02	44.4
213	Thrombotic cerebral infarction	2022.02.02	2439797	1	1	70	No	Yes	Yes	Yes	No	No	174	119	10	7.12	2.44	2.91803	180	11.3	14.3	0.2	36	33	18	137	102	3	235	74.1	47.2	1.8	12.4	5.9	6.5		83	243.3	9.27	0	3.26	1.56	0.82	1.8	11.5	86	1.06	1.06	34.6
214	Cerebral infarction	2022.02.02	2439873	3	2	72	No	No	No	No	No	No	133	83	9.5	8.67	0.7	12.3857	252	9.7	10.6	0.25	21.1	11	16	28	64	1.6	130	58	37.4	1.8	9.7	5	4.7		62	141.3	8.15	0	4.81	0.99	1.3	3.01	11.1	91	1.03	1.03	25.2
215	Multiple cerebral infarctions	2022.02.02	2439899	14	2	83	No	No	No	No	No	Yes	147	82	15.3	12.9	1.65	7.81818	131	10.9	16.1	10.9	16.1	14	21	5	114			74.7	41.4	1.2	19.4	9	10.4		393	393.1	10.79	1	4.04	1.59	0.8	2.46	13.9	65	1.29	1.28	31.6
216	Cerebral infarction due to embolism	2022.02.03	2440023	0	1	60	Yes	Yes	Yes	Yes	No	Yes	165	68	6.8	4.71	1.77	2.66102	286	10.5	12.1	0.3	29.3	10	13	71	87	4.7	230	69.4	41.4	1.5	9	3.6	5.4		76	238.4	9.8	0	4.04	1.93	1.41	2.22	10.3	103	0.95	0.96	29.4
217	Thrombotic cerebral infarction	2022.02.03	2440027	10	1	70	Yes	Yes	No	No	No	Yes	139	73	11	9.77	0.825	11.8424	150	12.8	16.4	0.19	48	19	27	12	83	9.2	143	62	37.8	1.6	8.9	4	4.9	0.88	76	178	6.28	1	5.24	0.62	1.4	3.39	10.2	104	0.94	0.95	94.5
218	Cerebral infarction	2022.02.03	2315063	10	2	63	No	No	No	No	Yes	Yes	119	72	5.9	4.51	1.19	3.78992	436	9.8	10.8	0.43	22.6	7	13	6	46	1.7	99	41.4	23.4	1.3	2.9	1.4	1.5		182	567.9	4.66	0	3.54	2.35	0.49	2.25	9.7	114	0.9	0.9	32.2
219	Thrombotic cerebral infarction	2022.02.03	2440079	3	2	69	No	No	Yes	Yes	No	Yes	184	84	18.3	15.65	2.23	7.01794	320	10.5	11.9	0.34	28.3	53	39	325	231	2.5	68	64.5	34.5	1.2	4.6	2.8	1.8	1.72	91	168.3	14.32	1	3.61	1.36	0.53	2.49	12.4	77	1.15	1.14	24.4
220	Cerebral infarction	2022.02.05	2440410	9	1	69	No	No	No	No	Yes	No	151	105	10.7	8.88	1.57	5.65605	148	11.9	14.7	0.18	42.1	22	108	6	88	6.1	102	62.8	35.2	1.3	22.9	12.9	10	2.09	167	345.2	8.28	1	4.34	1.31	1.09	2.87	12.3	78	1.14	1.13	42.9
221	Thrombotic cerebral infarction	2022.02.07	2441261	2	1	71	No	No	Yes	Yes	No	No	142	88	19	17.67	0.74	23.8784	282	12	15	0.34	40.7	48	37	26	106			52.7	28.1	1.1	4.8	3.3	1.5		256	245.8	21.26	1	2.45	2.11	0.48	0.98	16.9	92	1.03	1.03	26
222	Cerebral infarction	2022.02.08	2442318	6	1	61	No	No	No	No	No	Yes	126	78	11.4	8.8	2.25	3.91111	350	11.2	14.2	0.39	36.2	7	13	24	82			77.7	51.4	2	27.2	9.5	17.7		104	8.5	14.45	1	4.74	1.41	1.06	2.97	10.8	96	1	1	34.9
223	large-scale cerebral infarction	2022.03.07	2459075	14	2	64	No	No	No	No	No	是	134	80	19.2	16.55	2.19	7.55708	120	11.3	14.1	0.14	34.7	56	68	47	90			73.1	43.7	1.5	19.9	5.1	14.8		104	362.2	9.52	1					11.4	87	1.06	1.05	27.1
224	Thrombotic cerebral infarction	2022.03.07	2459169	4	2	62	Yes	No	Yes	No	Yes	No	145	80	8.7	4.13	3.33	1.24024	318	10.7	12.4	0.34	30.1	9	13	17	88	3.7	195	63.9	39.8	1.7	11.7	4.1	7.6		65	336.9	5.23	0	4.38	0.92	1.24	3.03	11.3	89	1.05	1.05	3109
225	Brainstem infarction	2022.03.10	2460972	4	1	60	No	No	No	Yes	No	Yes	134	81	12	7.26	4.38	1.65753	330	10.1	12.3	0.33	25.6	42	25	19	122			83.7	49.5	1.4	14.6	3.8	10.8		78	388.1	7.02	1	4.21	1.75	0.87	2.86	10.7	98	0.99	0.99	30.6
226	Cerebral infarction	2022.03.23	2006231	2	2	70	No	No	Yes	No	No	Yes	158	94	4.8	3.4	1.23	2.76423	458	9.7	11.1	0.44	22.3	20	20	13	69			79.3	48.4	1.6	7	2.3	4.7		58	200	6.9	0	4.5	1.37	0.9	2.72	10.8	96	1	1	32.8
227	Cerebral infarction due to occlusion or stenosis of the cerebral artery	2022.04.03	2468955		2	65	No	No	No	No	No	Yes	115	76	5.5	3.81	1.53	2.4902	227	12.2	15.2	0.28	43	12	15	9	151			799.1	52.1	1.9	14.2	3.9	10.3		80		5.97	0	6.08	1.62	1.08	4.68	11.3	89	1.05	1.05	55.4
228	Thrombotic cerebral infarction	2022.04.14	2330381	4	1	84	Yes	Yes	Yes	Yes	Yes	Yes	177	96	8.8	6.36	0.18	35.3333	203	10.9	12.7	0.22	32.3	20	17	22	79	7	197	66.8	39.1	1.4	12.2	4.8	7.4		84	238.7	5.73	0	3.2	0.73	0.87	1.88	11.5	86	1.06	1.06	33.1
229	Cerebral infarction due to cerebral artery occlusion	2022.04.28	2476608	8	2	62	No	Yes	No	No	No	Yes	193	110	7.8	5.73	1.84	3.11413	272	10.7	11.7	0.29	29.9	9	13	45	80	1.7	225	71.5	40.2	1.3	28.5	12.9	15.6		62	242.1	10.63	0	5.18	1.99	1.17	3.74	10.2	107	0.94	0.94	33.2
230	Thrombotic cerebral infarction	2022.04.29	2476848	8	1	63	No	No	No	No	No	Yes	165	71	7.5	5.05	2.01	2.51244	238	11.2	14	0.27	34.6	17	13	17	97	4.9	187	62.9	37.9	1.5	5.3	2.3	3		85	273.1	8.22	0	4.12	1.09	1.04	3	9.2	131	0.85	0.85	32.9
231	large-scale cerebral infarction	2022.05.03	2267182	13	2	71	No	No	Yes	Yes	Yes	Yes	152	100	10.4	9.05	1.14	7.9386	245	12.6	16	0.31	47.7	13	24	14	80			72.9	41	1.3	35.4	7.6	27.8	2.14	126	463	11.39	1	3.46	1.15	1.11	1.93	11.2	90	1.04	1.04	29.9
232	Thrombotic cerebral infarction	2022.05.10	2480122	1	2	61	No	No	Yes	Yes	No	Yes	150	105	12	11.28	0.63	17.9048	274	11	13.1	0.3	33.8	14	13	32	94	1.9	242	67.8	41.2	1.5	17.7	5.8	11.9		94	302.4	21.63	1		1.43	1.31	2.93	9.9	113	0.92	0.92	30.5
233	Thrombotic cerebral infarction	2022.05.16	2482980	0	2	64	Yes	No	Yes	Yes	Yes	Yes	146	68	11.8	7.69	3.65	2.10685	456	10.5	11.9	0.48	28.5	14	13	34	90	1.8	250	62.9	41.7	2	4.4	1.7	2.7		93	334.3	4.41	1	4.04	1.76	0.89	2.84	10.3	105	0.95	0.95	37.5
234	Brainstem infarction	2022.05.17	2483735	0	2	68	Yes	No	Yes	No	No	Yes	152	99	7.1	5.14	1.78	2.88764	276	11.6	13.7	0.32	36.9	12	14	18	133	1.7	152	65.4	42	1.7	14.1	4.1	10		51	161.8	4,65	0	5.08	1.44	1.18	3.26	11.1	92	1.03	1.03	27.1
235	Cerebral infarction due to occlusion or stenosis of the cerebral artery	2022.05.18	2483843	7	2	68	Yes	Yes	No	No	No	Yes	163	86	9.4	7.54	1.61	4.68323	184	11.8	46.3	0.22	39.4	29	26	80	76	10.9	249	72.1	43.3	1.5	30	8.9	21.1		102	359.5	7.15	0	6.83	2.65	1.09	4.94	10.9	95	1.01	1.01	38
236	Cerebral infarction due to occlusion or stenosis of the cerebral artery	2022.05.22	2485760	25	2	71	No	No	No	Yes	Yes	Yes	116	58	6.3	4.57	1.56	2.92949	303	12.8	18	0.39	47	37	29	102	248			57.1	27.4	0.9	11	4.3	6.7		71	119.6	12.73	0	2.79	1.69	0.65	1.35	11.2	91	1.04	1.04	29.5
237	large-scale cerebral infarction	2022.05.27	2489503	11	1	81	No	No	No	No	No	No	121	70	7.8	5.75	1.72	3.34302	151	12.3	15.6	0.19	44.3	51	68	67	76			68.6	38.9	1.3	32.6	10	22.6		92	340.3	7.2	0					14.8	58	1.37	1.37	39.3
238	Thrombotic cerebral infarction	2022.06.01	2492343	1	1	64	No	No	Yes	No	No	Yes	121	81	5.7	3.12	1.95	1.6	159	11.3	13.1	0.18	35.1	14	20	19	55	10	199	64.4	39.3	1.6	13.6	6.4	7.2		80	416.1	5.71	0	3.91	1.17	0.74	2.82	11.7	84	1.08	1.08	27.4
239	Thrombotic cerebral infarction	2022.06.12	2498289	3	2	65	No	No	Yes	Yes	No	Yes	125	69	9.9	7.15	2.43	2.94239	237	12.6	16.9	0.3	44.9	11	13	23	123	3.3	188	77.2	46.6	1.5	28	11.6	16.4		80	223	13.56	1	6.16	2.57	1.2	4.23	10.9	95	1.01	1.01	37.1
240	Thrombotic cerebral infarction	2022.06.13	2499327	3	1	70	Yes	Yes	No	Yes	No	Yes	139	75	6.9	4.44	1.97	2.25381	191	13.2	17.6	0.25	50.1	25	19	57	64	2.6	252	64.5	39.9	1.6	11.5	5.6	5.9		97	311.3	6.78	0	4.96	2.51	0.69	3.07	10.1	106	0.94	0.94	35.9
241	Cerebral infarction due to occlusion or stenosis of the cerebral artery	2022.06.16	2501699	2	1	68	Yes	Yes	Yes	No	No	Yes	162	109	6	4.5	1.23	3.65854	215	12.5	48.2	0.27	45.2	10	13	36	70	2.4	193	68.9	41.1	1.5	8.5	4.3	4.2		122	252.6	4.28	0	4.28	2.18	0.83	2.66	10.5	100	0.97	0.97	34.9
242	Thrombotic cerebral infarction	2022.06.17	2501644	1	1	68	Yes	Yes	Yes	No	No	Yes	138	86	7.3	4.8	1.7	2.82353	223	8.1	16.5	0.181																		0	4.66	0.63	1.43	2.7	10	104	0.93	0.93	28.3
243	Thrombotic cerebral infarction	2022.06.19	2502764	3	1	70	Yes	Yes	Yes	No	No	Yes	158	84	8	4.89	2.59	1.88803	271	10.7	12.3	0.29	20.7	7	13	56	107	5.4	245	65.3	40.9	1.7	5.9	3.4	2.5		78	247.1	6.93	0	3.54	0.97	1.09	2.05	12.1	80	1.12	1.12	28.7
244	Thrombotic cerebral infarction	2022.07.13	2118638	0	1	64	Yes	Yes	Yes	No	No	Yes	147	94	5.8	3.25	2.12	1.53302	269	10.7	12.1	0.29	30.4	18	18	18	64	5.1	209	67.7	40	1.4	6.4	2.4	4		64	426.3	5.22	0	3.68	1.8	0.7	2.33	10.1	106	0.94	0.94	43.3
245	large-scale cerebral infarction	2022.07.22	2524295	15	2	75	No	No	Yes	No	No	No	151	78	14.3	13.15	0.85	15.4706	160	11.8	14.8	0.19	38.9	9	28	7	73			69.1	40.6	1.4	13.7	3.4	10.3		81	118.1	6.35	1					10.8	96	1	1	24.6
246	Thrombotic cerebral infarction	2022.08.31	2547885	32	1	61	Yes	Yes	No	No	No	No	137	114	10.2	9.38	0.72	13.0278	196	10.3	11.4	0.2	26.7	15	16	415	76	5.5	234	60.1	37.4	1.6	12.1	5.3	6.8	0.7	48	155	5.43	1	4.57	1.61	1.46	2.48	9.2	125	0.85	0.86	30.4
247	Thrombotic cerebral infarction	2022.09.01	2548268	11	1	69	Yes	Yes	Yes	No	No	Yes	146	91	6	4.19	1.65	2.53939	119	11.5	14.3	0.14	36.3	7	15	40	53	4.6	197	60.6	39.4	1.9	42.1	12.7	29.4		63	361.1	4.5	0	3.58	0.97	1.13	2.11	12.7	74	1.18	1.17	33.9
248	Thrombotic cerebral infarction	2022.09.01	2548518	3	2	66	Yes	No	No	No	No	Yes	131	90	15.2	13.3	1.66	8.01205	221	13.6	18.8	0.3	54.3	16	25	26	108	1.6	211	67.2	44	1.9	21.3	5.3	16		56	265.2	5.16	1	5.15	2.06	1.26	2.97	9.9	110	0.92	0.92	28.5
249	Cerebral infarction due to cerebral artery occlusion	2022.09.04	2164744	1	1	68	Yes	No	Yes	Yes	No	Yes	161	89	8.8	5.57	2.93	1.90102	218	11.4	14.2	0.25	36.4	16	13	10	65	2	226	70.5	45.4	1.8	18.3	4.8	13.5		97	323.1	15.34	0	4.86	1.7	0.95	3.49	10.5	101	0.97	0.97	32.9
250	Thrombotic cerebral infarction	2022.09.08	2550860	4	1	73	Yes	Yes	No	No	No	Yes	141	76	10.8	8.57	1.98	4.32828	219	13.2	17.5	0.29	50.8	8	21	41	57	3.4	229	59.1	36.4	1.6	18.6	4.9	13.7		61	323.6	5.04	1	3.88	0.97	1.12	2.23	10.8	96	1	1	33.7
251	Cerebral infarction due to occlusion or stenosis of the cerebral artery	2022.09.08	2550841	33	1	75	No	Yes	Yes	No	No	Yes	134	80	13.6	12.35	1.07	11.5421	264	11	13.2	0.29	33.7	26	32	18	72			79.5	40.6	1	14.1	3.6	10.5		75	386.8	5.98	1	3.89	1.1	0.9	2.35	11.9	82	1.1	1.1	30.4
252	Cerebral infarction due to occlusion or stenosis of the cerebral artery	2022.09.08	2550754	7	1	68	Yes	Yes	Yes	Yes	No	Yes	159	83	9.3	7.46	1.53	4.87582	253	10.3	11.8	0.26	26.7	16	13	55	98	1.3	233	65.1	38.8	1.5	11	3.3	7.7		178	446.3	7.22	0	4.71	4.86	0.53	1.73	10.6	100	0.98	0.98	37.7
253	Cerebral infarction due to occlusion or stenosis of the cerebral artery	2022.09.10	2551293	33	1	65									7.2				213	10.5	11.4			21	21	16	90			73	43.4	1.5	10.9	3.9	7				6.69	0	4.58	0.94	1.79	2.13	9.9	113	0.92	0.92	35.5
254	Thrombotic cerebral infarction	2022.09.11	2551412	2	1	63	No	No	No	No	No	No	157	108	6.5	4.2	2.07	2.02899	183	12.2	16.1	0.22	41.7	16	15	22	105	14.1	295	73	43.8	1.5	19	5.4	13.6		79	172.2	5.84	0	4.76	1.89	1.04	2.95	10.2	104	0.94	0.95	33.1
255	Thrombotic cerebral infarction	2022.09.11	2525534	10	1	61	Yes	No	No	Yes	No	No	154	98	12.3	9.94	2.11	4.7109	220	10.2	11.7	0.22	27.1	27	15	30	108	4.5	192	64.9	39.4	1.5	5.8	2.5	3.3		72	361.2	13.78	1	5.23	1.96	1.13	3.17	9.9	113	0.92	0.92	38.3
256	Thrombotic cerebral infarction	2022.09.12	2551896	11	1	60	Yes	Yes	No	No	No	Yes	136	75	9.8	8.91	0.68	13.1029	213	11.4	14.1	0.24	36.8	12	18	15	63	3.7	213	63.6	39.1	1.6	15.9	5.1	10.8		87	322.2	5.12	0	4.41	0.43	1.36	2.82	10.9	95	1.01	1.01	34.3
257	Cerebral infarction	2022.09.12	2551850	3	1	74	Yes	Yes	Yes	Yes	No	Yes	188	115	8.5	6.92	1.13	6.12389	196	10.9	13.5	0.21	32.4	8	13	21	56	1.8	220	63.8	41.4	1.8	12.3	3.9	8.4		99	367.7	4.34	0	4.36	0.82	1	2.9	10.9	95	1.01	1.01	34.2
258	Thrombotic cerebral infarction	2022.09.12	2551740	2	1	75	No	No	Yes	No	No	Yes	157	83	5.4	3.59	1.37	2.62044	216	12.2	15.4	0.26	41.9	11	17	9	107	4.2	195	62	39.6	1.8	9.6	2.6	7		93	267.8	4.95	0	5.19	1.16	1.37	3.07	9.6	116	0.89	0.89	34.3
259	Thrombotic cerebral infarction	2022.09.12	2551628	1	2	60	No	No	No	No	No	Yes	145	80	9.2	7.8	1.06	7.35849	206	11.6	14.1	0.24	36.7	10	15	11	63	1.5	213	73.9	39.4	1.1	10	3.2	6.8		72	304	4.91	0	4.66	1.45	1.08	2.9	10.8	95	1	1	32.3
260	Cerebral infarction due to occlusion or stenosis of the cerebral artery	2022.09.15	2553597	17	1	76	Yes	No	No	No	No	No	132	78	6.3	5.56	0.59	9.42373	140	10.3	11.3	0.14	26.2	15	24	33	88			75.6	46	1.6	19.7	6.8	12.9		67	382.3	6.74	0	4.44	0.64	1.63	2.52	11.7	84	1.08	1.08	32
261	Thrombotic cerebral infarction	2022.09.16	2554196	21	1	67	Yes	Yes	No	No	No	Yes	152	88	12.7	11.27	1.23	9.1626	261	11.4	13.3	0.3	36.5	15	14	28	70	2.6	165	56.3	35.8	1.7	12.9	3.8	9.1		75	332.1	5.45	1	4.5	1.71	0.72	2.93	10.9	94	1.01	1.01	29.4
262	Thrombotic cerebral infarction	2022.09.17	2554435	4	1	60	Yes	Yes	No	No	No	Yes	143	86	11.7	9.93	1.59	6.24528	329	11.6	13.2	0.38	35.8	21	18	39	109	7.6	156	62.7	37.6	1.5	8.2	3.2	5		104	248.2	4.54	1	3.91	1.01	0.81	2.92	11.5	87	1.06	1.06	30.5
263	Cerebral infarction due to embolism	2022.09.17	2554288	20	2	62	No	No	Yes	Yes	No	Yes	104	61	4.6	3.56	0.86	4.13953	224	11.7	14	0.26	38	13	16	159	161	5.9	158	83.6	38.9	0.9	14	5.9	8.1		51	231.2	9.72	0	3.82	0.45	0.96	2.66	12.2	79	1.13	1.13	31.2
264	Thrombotic cerebral infarction	2022.09.17	2554386	4	1	60	No	No	No	No	No	Yes	145	90	10	6.61	2.9	2.27931	288	11.4	13.9	0.33	36.8	17	17	20	124	9.5	163	68.7	42	1.6	6.2	1.8	4.4		72	330.7	4.34	1	4.34	1.45	0.75	3.18	10.3	103	0.95	0.96	36.7
265	Thrombotic cerebral infarction	2022.09.21	2556562	11	1	63	No	No	No	No	No	Yes	167	96	12.8	11.71	0.28	41.8214	205	11	13	0.22	32.3	64	42	77	114			87.6	47.8	1.2	16.5	4.6	11.9		91	269.2	9.73	1	4.8	1.24	1.08	3.21	11.6	85	1.07	1.07	33.4
266	Thrombotic cerebral infarction	2022.09.22	2557282	0	2	61	No	No	No	No	No	Yes	144	71	19.5	16.98	2.2	7.71818	283	10.6	12.4	0.3	29.5	32	26	53	91	2	177	68.3	44	1.8	17.6	6	11.6		55	244.7	6.01	1	3.95	1.26	1.05	2.29	10.5	100	0.97	0.97	30.2
267	Thrombotic cerebral infarction	2022.09.22	2448386	4	2	65	No	No	Yes	No	Yes	Yes	130	63	9.4	6.92	2.22	3.11712	212	11.8	14.1	0.25	39.1	31	25	54	77	5.1	136	63.5	40.4	1.7	10.4	3	7.4		60	303	5.24	0	3.99	1.74	0.98	2.24	10.5	100	0.97	0.97	31.2
268	Cerebral infarction due to occlusion or stenosis of the cerebral artery	2022.09.23	2557978	28	1	67	No	Yes	No	Yes	No	Yes	145	86	17.5	14.38	3.41	4.21701	262	11.6	14.2	0.3	37.7	16	15	378	88	3	201	78.3	44.8	1.3	12.8	4.6	8.2		95	345.4	15.94	1	4.54	1.29	1.28	2.89	10.5	100	0.97	0.97	27.7
269	Cerebral infarction due to embolism	2022.09.23	2094585	12	2	60	No	No	Yes	No	Yes	Yes	170	122	18.2	15.33	2.78	5.51439	270	11.4	13.7	0.31	36.8	26	36	22	107			97.8	51.5	1.1	16.6	4.4	12.2		63		10.3	1	4.93	0.71	1.22	3.38	10.8	95	1	1	31.3
270	Thrombotic cerebral infarction	2022.09.26	2559066	6	1	67	No	No	Yes	No	No	Yes	194	87	14.7	12.78	1.72	7.43023	215	12.2	17	0.26	43.4	17	13	30	62	1	223	63.8	39.4	1.6	19.7	5.2	14.5		69	279	4.84	1	3.58	1.15	1.02	2.58	11.7	84	1.08	1.08	22.3
271	Thrombotic cerebral infarction	2022.09.27	2559317	3	1	60	Yes	Yes	No	No	No	Yes	134	75	6	4.34	1.4	3.1	169	11.8	15.8	0.2	39.3	10	15	20	51	2.6	182	59.8	39.2	1.9	17.6	5.3	12.3		54	272.7	5.04	0	4.35	1.16	1.18	2.84	10.9	94	1.01	1.01	31.5
272	Cerebral infarction due to occlusion or stenosis of the cerebral artery	2022.10.05	2561495	16	1	69	Yes	Yes	Yes	Yes	No	Yes	138	65	13.1	11.21	1.67	6.71257	184	11	13.6	0.2	33	24	24	50	67	3.5	261	75.1	42.8	1.3	19	6	13	1.27	89	562.6	11.76	1	5.57	2.47	1.24	3.74	11.3	88	1.05	1.04	35.6
273	Cerebral infarction due to occlusion or stenosis of the cerebral artery	2022.10.06	2561933	2	2	71	No	No	Yes	No	No	No	191	102	7.3	5.22	1.76	2.96591	230	9.9	10.9	0.23	23.1	14	22	16	104	12.7	149	81.7	48.9	1.5	11.7	5	6.7		49	201.2	5.54	0	4.99	1.04	1.27	3.55	10.7	96	0.99	0.99	35.5
274	Brainstem infarction	2022.10.06	2561956	12	1	76	No	Yes	No	No	No	Yes	153	102	8.6	6.97	1.39	5.01439	196	11.7	14.5	0.23	39.7	9	14	12	112	2	182	71.6	43.2	1.5	13.9	6.1	7.8		71	304.1	6.79	0	4.15	0.92	1.21	2.75	9.6	116	0.89	0.89	27.7
275	Thrombotic cerebral infarction	2022.10.08	2437438	18	1	87	Yes	Yes	Yes	No	No	Yes	142	88	4.1	2.69	1.1	2.44545	282	10.5	12.6	0.3	29.5	11	14	30	83	5.2	163	74.4	40.6	1.2	8.7	4.4	4.3		104	443.3	6.66	0	3.23	0.76	1.21	1.78	11.7	84	1.08	1.08	28
276	Thrombotic cerebral infarction	2022.10.08	2562998	4	1	63	Yes	Yes	No	No	No	No	166	117	11.7	10.02	1.32	7.59091	168	13	18.2	0.22	49.7	12	15	20	69	17	189	62.7	39	1.6	16.4	7.1	9.3		83	361.1	4.74	1	4.26	0.76	1.15	3.02	9.9	110	0.92	0.92	29.3
277	Thrombotic cerebral infarction	2022.10.08	2562978	10	1	80	No	Yes	Yes	No	No	Yes	159	94	5.5	2.95	2.31	1.27706	216	12	15.4	0.26	42.1	10	17	16	48	27.6	258	80.1	43.7	1.2	14.7	6.5	8.2		94	336.7	5.52	0	5.05	1.43	1.41	3.25	10.3	103	0.95	0.96	29.9
278	Cerebral infarction due to occlusion or stenosis of the cerebral artery	2022.10.09	2563198	28	1	64	Yes	Yes	Yes	Yes	No	Yes	170	91	11.3	9.53	1.44	6.61806	350	9.7	10.6	0.34	21.8	9	13	17	98	0.9	147	69.6	45.4	1.9	14.6	6.2	8.4		87	259.3	11.4	1	4.42	2.6	0.77	2.84	9.9	113	0.92	0.92	31.5
279	Cerebral infarction due to occlusion or stenosis of the cerebral artery	2022.10.09	2190777	30	2	74	No	No	Yes	No	No	Yes	184	86	6.4	4.9	1.25	3.92	131	13.2	19	0.17	49.1	21	20	38	109			73.8	42.7	1.4	13.5	3.4	10.1		74	350.1	9.23	0	6.56	2.66	0.95	2.11	10.8	95	1	1	31.2
280	Thrombotic cerebral infarction	2022.10.16	2566265	9	2	69	No	No	Yes	No	No	No	189	94	8.5	6.97	1.37	5.08759	304	11.4	13.7	0.34	36	20	20	29	116			76.2	45.3	1.5	11	3.9	7.1		48	176.4	13.43	0	7.41	2.52	0.91	5.62	10.3	105	0.95	0.95	24.2
281	Thrombotic cerebral infarction	2022.10.16	2566141	7	2	63	No	No	No	Yes	No	No	152	70	6	4.08	1.72	2.37209	303	9.6	10.9	0.29	21.3	18	13	37	96			73.5	47.1	1.8	7.4	3.2	4.2		54	335.7	6.47	0	4.9	2.62	0.85	3.02	9.9	110	0.92	0.92	31.1
282	Thrombotic cerebral infarction	2022.10.17	2566748	22	1	61	Yes	Yes	No	Yes	No	Yes	149	97	9	7.8	1.09	7.15596	233	11.8	15.7	0.28	41.7	19	13	27	98			79.3	53.8	2.1	19.2	5.3	13.9		64	212.3	15.53	0	6.35	1.89	1.21	4.66	9.5	118	0.88	0.88	28.3
283	Cerebral infarction due to embolism	2022.10.17	2566747	30	1	67	Yes	Yes	Yes	No	No	Yes	136	95	5.5	4.57	0.8	5.7125	203	11.4	14.2	0.23	36.9	7	17	9	110			76.9	44.3	1.4	13.3	4.7	8.6		58	219	5.13	0	3.78	0.71	1.23	2.46	11.1	91	1.03	1.03	34.9
284	Cerebral infarction due to occlusion or stenosis of the cerebral artery	2022.10.18	2567560	20	1	70	No	Yes	No	No	No	Yes	136	68	12.3	10.74	1.16	9.25862	196	11.1	12.8	0.22	33.5	21	26	60	112			74.7	41.6	1.3	13.8	2.9	10.9		162	294.7	5.83	1	3.57	2.68	0.66	2.04	12.5	76	1.16	1.16	22.2
285	Cerebral infarction	2022.10.19	2568081	2	1	78	Yes	No	No	No	No	Yes	153	59	6	5.12	0.73	7.0137	144	11.6	15.1	0.17	37	18	26	31	103			75.2	46.1	1.6	14.4	4.7	9.7		84	258.9	6.41	0	3.65	0.62	1.09	2.56	10.7	96	0.99	0.99	32.3
286	Thrombotic cerebral infarction	2022.10.22	2569231	7	1	77	No	No	Yes	No	No	Yes	165	99	12	10.73	1.08	9.93519	258	11.9	15.5	0.31	40.6	11	19	6	81			81.9	43.2	1.1	7.5	2.2	5.3		73	295.2	5.52	1	4.78	0.76	1.55	2.97	11.3	89	1.05	1.05	36.6
287	Thrombotic cerebral infarction	2022.10.22	2569211	10	1	72	No	No	No	No	No	Yes	143	58	6.3	4.22	1.89	2.2328	203	11.2	13.4	0.23	35.1	7	15	6	53			59.8	41.7	2.3	18.1	5.3	12.8		45	315.7	5.82	0	3.65	0.97	1.33	2.13	10.8	95	1	1	32.9
288	Thrombotic cerebral infarction	2022.10.24	2570282	6	1	68	No	Yes	Yes	No	No	No	171	99	8.9	7.7	0.89	8.65169	177	12.5	16.3	0.22	44.2	15	32	53	95			77.4	53.2	2.2	18.7	5.3	13.4		64	274.3	6.97	0	7.3	1.08	1.86	5.15	10.3	103	0.95	0.96	36
289	Cerebral infarction due to embolism	2022.10.24	2570453	5	1	67	Yes	Yes	Yes	Yes	No	No	202	108	6.8	5.88	0.83	7.08434	190	12.2	15.6	0.23	43.3	24	30	47	106			79.8	52	1.9	12	3.2	8.8		70	225.8	7.28	0	4.93	1.48	1.3	3.41	9.6	116	0.89	0.89	31.4
290	Thrombotic cerebral infarction	2022.10.24	2570528	9	2	75	No	No	No	Yes	No	Yes	181	80	6	4.57	1.33	3.43609	214	9.7	10.4	0.21	21.8	10	13	1	73			72	49.7	2.2	6.1	2.7	3.4		77	277.7	9.02	0	4.98	3.2	1.1	2.7	9.7	114	0.9	0.9	27.7
291	Cerebral infarction	2022.10.25	2571179	9	1	81	Yes	Yes	No	No	No	Yes	168	118	12.8	8.06	4.24	1.90094	346	11	12.5	0.38	32.4	26	21	27	153			75.6	44.5	1.4	5.1	4.1	1		96	277.2	4.73	1	3.84	2.26	0.78	2.52	10.2	104	0.94	0.95	35.1
292	Cerebral infarction due to occlusion or stenosis of the cerebral artery	2022.10.26	2571718	18	1	89	No	No	Yes	Yes	Yes	Yes	133	104	5.7	3.81	1.63	2.33742	194	11.3	14.6	0.22	37.3	19	31	15	31			75	47.1	1.7	16.6	6.1	10.5		132		8.73	0	3.9	1.28	0.98	2.53	11.3	88	1.05	1.04	32.8
293	Hemorrhagic cerebral infarction	2022.10.30	2572944	6	2	75	No	No	No	No	No	No	133	70	9	6.75	1.7	3.97059	275	11.5	13.7	0.32	36.2	31	44	119	133			69.3	42.7	1.6	28.4	12	16.4		35	89.6	5.64	0					13.3	69	1.23	1.22	33
294	Thrombotic cerebral infarction	2022.11.05	2575938	2	1	60	No	No	No	No	No	Yes	136	81	6.5	4.75	1.55	3.06452	190	9.9	11.2	0.19	24.2	13	41	79	79			82.4	53.4	1.8	14.7	4.8	9.9		55	229.5	4.56	0	3.27	0.4	1.19	1.81	11.7	84	1.08	1.08	33.5
295	Thrombotic cerebral infarction	2022.11.06	2462447	3	2	77	No	No	Yes	Yes	No	Yes	120	67	8.1	5.81	1.91	3.04188	216	11.2	13.7	0.24	35.4	22	24	20	92			76.3	42.8	1.3	6.3	3.3	3		75	394	6.96	0	3.99	2.94	0.76	2.02	10.4	101	0.96	0.96	29.7
296	Thrombotic cerebral infarction	2022.11.07	2576199	1	1	71	Yes	No	No	No	No	Yes	138	84	13	10.13	2.51	4.03586	329	11.5	14.1	0.38	36.9	34	24	23	75			79.7	50.1	1.7	8.5	2	6.5		71	330.8	4.73	1	4.9	0.81	1.24	2.81	10	108	0.93	0.93	36.2
297	Thrombotic cerebral infarction	2022.11.07	2223624	2	1	60	No	No	No	No	Yes	Yes	132	85	17.7	14.88	2.42	6.14876	192	11.9	15.2	0.23	40.3	25	22	10	162			67.8	42.8	1.7	11.1	3.3	7.8	0.77	74	304	4.46	1	3.25	0.88	0.73	2.07	11.7	84	1.08	1.08	29.8
298	Thrombotic cerebral infarction	2022.11.07	2576478	2	1	62	Yes	Yes	No	No	No	Yes	127	72	10.2	6.63	3.03	2.18812	332	11.3	14.1	0.38	36	29	33	217	122			78.5	51.4	1.9	20.6	6.8	13.8		58	163.5	5.06	1	5.22	1.32	1.01	3.43	11	93	1.02	1.02	30.2
[truncated: 4 more columns]

## Sheet: Table S2-Supplementary material
Table S2-Supplementary materials: Clinical data of the control group
Control group	Date	Medical record number	NIHSS score	Gender (1 male, 2 females)	Age	Smoking history	Drinking history	History of hypertension	History of diabetes	History of coronary heart disease	Arterial plaque in the neck or/and lower limbs	Systolic blood pressure (90-140 mmHg)	Diastolic blood pressure (60-90 mmHg)	White blood cell count(4-10) × 109/L	NEUT#（2-7）×109/L	LYMPH#（0.7-4）×109/L	Neutrophil/lymphocyte ratio（NLR）	Platelet count（100-300）×109/L	MPV（7-11fl）	PDW（15-17%）	PCT(0.108-0.282%)	P-LCR(13-43%)	ALT（9-50U/L）	AST（15-40U/L）	γ-glutamyltransferase(0-60U/L)	ALP(45-125U/L)	TBA(0-10umol/L)	Prealbumin(200-430mg/L)	TP(65-85g/L)	ALB(40-55g/L)	Albumin/Globulin（A/G）1.2-2.4	TBIL(1.6-20.6umol/L)	DBIL(0-6.5umol/L)	IDBIL	CysC(0-1.16mg/L)	Crea（57-111umol/L)	UA（150-440umol/L)	GLU（3.9-6.1mmol/L）	CRP（Normal 0 Abnormal 1）	T-CH（1.80-5.17mmol/L）	TG（0.56-1.70mmol/L）	HDL-C（1.04-1.70mmol/L）	LDL-C（0.45-3.15mmol/L）	PT（8.6-13Sec）	PT%（80-120%）	PTR（0.8-1.2）	INR（0.8-1.2）	APTT（26-42Sec）	Fbg C（2-5g/L）
2	2021.01.05	2264499	0	1	67	No	No	No	No	Yes	Yes	139	67	4.4	2.95	1.19	2.47899	195	10.7	12.3	0.21	30.4	12	16	15	65	4.6	318	77.1	49.3	1.8	28.6	13.2	15.4	0.8	69	342	5.84	0	3.73	0.8	1.57	1.99	12	83	1.11	1.11	34.1	2.09
3	2021.01.11	2146766	0	2	66	No	No	Yes	No	No	No	160	99	4.9	2.64	1.99	1.32663	234	11.1	12.2	0.26	33.3	11	18	16	48	2.8	172	84.4	46.4	1.2	16.6	6	10.6	0.99	84	292	5.55	0	3.81	0.69	1.63	2.07
4	2021.01.11	2267807	0	1	76	No	No	No	Yes	No	No	145	90	5.2	3.36	1.44	2.33333	174	9.3	16.9	0.161		15	11	25	68	3.6	281	76.3	44.4	1.4	13.5	6	7.5	1.23	107	389.1	7	0	4.65	1.41	0.97	3.34
5	2021.01.15	2269397	0	2	70	No	No	No	Yes	Yes	Yes	148	83	7.1	4.72	1.93	2.4456	148	11.3	13.2	0.17	34.7	10	11	13	73	2.3	271	72.2	44.6	1.6	12.2	5.4	6.8	0.75	58	278.4	7.79	0	3.78	1.66	1.47	1.83	10.4	117	0.96	0.96	33.9	2.12
6	2021.01.15	2122226	0	1	69	No	No	Yes	Yes	Yes	Yes	148	96	9	6.73	1.78	3.7809	181	9.9	11	0.18	23.7	12	12	24	74	4.2	211	74.5	45.8	1.6	11.5	4.7	6.8	0.89	81	280.9	11.03	0	4.75	1.46	1.06	3.41	10.4	117	0.96	0.96	33.2	2.76
7	2021.02.19	2274907	0	1	79	No	Yes	Yes	Yes	No	Yes	154	80	6.2	4.27	1.66	2.57229	212	10.4	11.9	0.22	28	8	8	16	52	3.3	160	70.8	41.1	1.4	26.5	8	18.5	0.72	57	197	13.24	0	3.64	0.93	0.91	2.45
8	2021.02.23	2275919	0	1	60	Yes	Yes	Yes	Yes	No	Yes	111	83	7.8	5.01	2.11	2.37441	328	10.3	12	0.34	26.9	12	16	35	38	7.6	239	72.4	44.1	1.6	7.1	2.8	4.3	0.8	92	324	7.34	0	3.89	2.49	1.02	2.09	11	104	1.02	1.02	36.9	3.53
9	2021.03.03	2142241	0	1	69	No	No	Yes	Yes	No	No	138	83	5.4	3.6	1.4	2.57143	204	8.9	16.8	0.18		36	19	14	48	1.6	241	67.1	44.5	2	11.8	5.3	6.5	0.9	79	350.8	6.67	0	3.43	1.19	1.18	1.8	11.5	95	1.06	1.06	38.8	2.03
10	2021.03.07	2281093	0	2	62	No	No	No	No	No	No	129	65	5.1	2.9	1.7	1.70588	247	9.9	16.1	0.244		15	19	21	101	10.8	190	74.7	43.2	1.4	4.8	2.2	2.6	0.7	66	297.9	4.82	0	5.16	3.04	1.09	2.73	11.1	102	1.03	1.03	38.2	2.91
11	2021.03.08	2281706	0	2	88	No	No	No	No	No	Yes	139	72	6.4	3.16	2.83	1.11661	189	10.4	11.7	0.2	27.6	9	16	11	58	2.7	224	72.4	47.1	1.9	14.7	6.5	8.2	0.89	65	206.3	5.22	0	4.43	1.03	1.53	1.88	10.7	100	0.99	0.99	26.7	1.94
12	2021.03.09	2281987	0	1	76	No	No	No	Yes	Yes	Yes	200	110	6.8	4.4	1.66	2.6506	192	10.8	12.4	0.21	31.1	15	14	21	75	4.8	231	62	41.7	2.1	9	4.1	4.9	1.12	76	248.5	9	0	5.18	1.34	1.03	3.43
13	2021.03.10	2282572	0	1	63	No	No	No	No	No	Yes	135	84	5.5	3.63	1.35	2.68889	196	10.5	11.8	0.21	28.4	11	11	22	70	4	234	77.8	47.3	1.6	11.5	5.3	6.2	0.88	95	499.1	5.94	0	4.44	0.87	0.98	3.05	11.1	102	1.03	1.03	36.6	2.26
14	2021.03.11	2282718	0	1	69	No	No	No	Yes	No	Yes	134	84	7.3	3.73	2.93	1.27304	202	10.9	11.8	0.22	30.2	18	19	24	74	4.9	303	74.7	45.3	1.5	11	5.1	5.9	1.01	80	386.4	8.69	0	4.46	1.27	1.39	2.26	10.7	110	0.99	0.99	31.8	2.95
15	2021.03.11	2282661	0	1	84	No	No	Yes	Yes	Yes	Yes	190	94	4.8	2.96	1.56	1.89744	186	10.9	13.4	0.2	31.2	19	17	11	60	1.9	183	65	41.5	1.8	14.8	6.7	8.1	1.19	96	407	6.3	0	3.48	1.43	0.91	1.93	10.6	112	0.98	0.98	31.1	2.81
16	2021.03.18	2286937	0	1	67	Yes	Yes	Yes	Yes	No	No	142	83	7.5	5.5	1.49	3.69128	459	10.2	12.1	0.47	26.8	24	24	37	91	1.2	298	77.8	49.5	1.7	10.9	5.1	5.8	0.87	73	326.9	5.46	0	3.82	1.66	1.24	26.8	11	104	1.02	1.02	37.6	3.17
17	2021.03.19	2287233	0	1	74	No	No	No	No	No	Yes	130	88	5.7	3.09	2.24	1.37946	189	10	11.3	0.19	24.9	10	13	26	60	5.4	201	64.5	42.3	1.9	21.3	8	13.3	0.9	80	276.6	4.63		3.57	1.25	0.97	2.15	12.1	87	1.12	1.12	37.9	2.37
18	2021.03.23	2288892	0	1	66	Yes	Yes	Yes	No	No	Yes	141	86	4.5	2.34	1.63	1.43558	178	11.7	15.7	0.21	38.4	26	28	163	79	6.8	297	71.2	44.3	1.6	17.9	8	9.9	1.31	109	506.5	5.48	0	4.92	4.59	0.88	2.26	10.4	117	0.96	0.96	32.4	2.41
19	2022.01.04	2127292	0	1	68	No	No	Yes	Yes	Yes	Yes	170	96	9.3	5.8	2.6	2.23077	217	8.7	16.3	0.188		35	24	80	110	1.6	396	77	52.2	2.1	19.7	5.4	14.3	1.1	71	444	7.84	0	4.56	2.48	1.41	2.55
20	2022.01.05	2428242	0	1	61	Yes	No	No	No	No	No	123	83	5	3.1	1.59	1.94969	168	11.2	13.9	0.19	34.7	15	16	20	43	5.1	299	68	44	1.8	14.3	4.2	10.1	1.06	92	501	4.81	0	4.45	1.07	1.67	2.33	10.7	97	0.99	0.99	31.1	2.07
21	2022.01.05	2428240	0	1	71	No	No	Yes	No	Yes	Yes	143	67	6.5	4.3	1.7	2.52941	231	8.7	15.9	0.2		23	22	23	55	2.2	303	76.8	48.9	1.8	10.4	4	6.4	1.07	89	392	6.21	0	3.65	1.56	0.96	2.09	11	93	1.02	1.02	41.3	3.13
22	2022.01.06	2199444	0	1	79	Yes	Yes	Yes	No	Yes	Yes	169	80	5.6	3.7	1.2	3.08333	121	13.4	18.6	0.161		19	17	31	84	9.8	220	59.6	39.5	2	11.8	3.2	8.6	1.36	108	425	5.61	0	3.8	1.89	0.7	2.42	11	93	1.02	1.02	37	3.32
23	2022.01.06	2151949	0	1	93	No	No	Yes	Yes	Yes	Yes	164	81	5.2	4	1.3	3.07692	134	12	16	0.16	42.2	10	13	10	64	7.2	114	63.6	34.6	1.2	6	2.5	3.5	2	110	283	8.74	0	3.01	0.53	1.2	1.58
24	2022.01.12	2432828	0	2	67	No	No	No	No	Yes	No	142	96	5.8	3.91	1.66	2.35542	242	12	14.9	0.29	42.3	19	13	4	88			69.3	40.8	1.4	9.6	2.8	6.8		47	225.8	8.89	0	3.84	0.86	1.23	2.09	12.6	75	1.17	1.17	27.6	2.15
25	2022.01.13	2244089	0	1	78	No	No	No	No	No	Yes	130	80	5.3	3.15	1.34	2.35075	120	13.1	18.4	0.16	49.9	27	29	19	93	4.6	279	72.8	45.7	1.7	16.3	5.4	10.9	0.9	72	414	5.43	0	3.88	0.57	1.43	2.1	11.1	97	1.03	1.03	38	2.78
26	2022.01.19	2188183	0	1	84	Yes	No	Yes	Yes	Yes	Yes	175	97	5.9	4.02	1.24	3.24194	165	12.5	17.9	0.21	45.1	10	16	45	115	4.3	194	77.2	43.3	1.3	12.6	6.2	6.4	1.57	99	480.3	6.75	1	5.16	1.83	1.24	3.43	11.4	88	1.06	1.06	30.8	3.54
27	2022.01.20	2436717	0	1	69	Yes	Yes	Yes	No	No	Yes	130	87	4.5	2.78	1.31	2.12214	158	11.7	15.3	0.19	38.9	11	13	22	103	18.2	217	73.9	45	1.6	16.6	5.1	11.5	1.02	81	321	5.7	0	4.74	0.92	1.12	3.27	10.6	104	0.98	0.98	32.7	4.69
28	2022.01.24	2438072	0	2	69	No	No	No	No	No	No	137	71	8.1	6.18	1.52	4.06579	282	12.1	15.7	0.34	42.4	14	23	14	76	1.3	350	80.2	53.3	2	21.3	5.7	15.6	1.1	71	385	5.4	0	5.35	1.26	1.6	3.08	10.8	95	1	1	40.1	3.02
29	2022.02.07	2440937	0	1	62	No	No	No	No	No	Yes	126	74	4.9	3.08	1.54	2	209	12	15.7	0.25	49.4	27	21	33	52	0.7	319	72.9	45.8	1.7	12	4.7	7.3	0.97	106	340.6	5.99	0	3.69	1.57	1.06	1.81	10.7	103	0.99	0.99	38.9	2.93
30	2022.02.08	2219991	0	1	66	No	No	Yes	No	Yes	Yes	127	76	5.3	3.34	1.42	2.35211	117	12.3	15.7	0.14	43.9	28	22	26	84	0.9	292	70.1	49.9	2.5	14.6	6.1	8.5	0.96	96	344.9	5.47	0	4.1	1.38	1.33	2.15	10.2	104	0.94	0.94	30	2.92
31	2022.02.10	2229933	0	1	67	No	No	Yes	Yes	Yes	我	145	85	4.6	2.15	2.13	1.00939	238	11.4	13.9	0.27	35.8	20	28	36	49	6	222	72.7	45.6	1.7	9.4	4.2	5.2	0.83	75	258	5.46		4.54	0.56	1.29	3	10.9	100	1.01	1.01	31.3	2.7
32	2022.02.10	2443675	0	1	68	No	No	Yes	No	Yes	Yes	149	97	5.9	4.16	1.37	3.0365	165	12.3	15.7	0.2	43.5	10	17	35	93	1.7	237	72.9	47.3	1.8	10.9	4.9	6	1	83	394.9	5.51		4.34	0.95	1.29	2.6	10.6	98	0.98	0.98	37.8	2.7
33	2022.02.10	2443676	0	2	60	No	No	Yes	No	Yes	Yes	126	90	7.2	3.82	3.07	1.2443	211	12.6	15.8	0.27	47.9	26	19	75	105	1.6	205	71	46	1.8	9.9	4.7	5.2	1	68	299.3	6.17	0	4.38	1.22	1.4	2.31	10.3	103	0.95	0.96	35.4	2.92
34	2022.02.14	2445653	0	2	72	No	No	Yes	No	No	Yes	177	92	4.5	2.15	1.96	1.09694	184	10.7	13.1	0.2	39.7	14	19	24	97	2.2	154	76	47.4	1.7	12.9	4.9	8	1.31	91	345.1	6.04	0	6.05	1.73	1.42	3.79	10.7	97	0.99	0.99	35.8	2.51
35	2022.02.18	2448898	0	1	64	Yes	Yes	Yes	Yes	No	Yes	155	105	7.1	3.9	2.5	1.56	252	8.9	16.5	0.223		25	21	61	102	3.5	279	76.4	47.6	1.7	9.5	4.4	5.1	0.72	79	190.6	9.25	0	4.74	0.93	1.83	2.76	10.1	113	0.94	0.94	32.4	3.53
36	2022.02.21	2450194	0	2	77	No	No	No	No	No	Yes	159	84	6.9	5.47	1.15	4.75652	214	12.5	16.3	0.27	46	10	22	13	99	4.5	203	81.6	48.8	1.5	11.4	4.2	7.2	1.39	80	208.4	5.36	0	4.73	1.59	1.36	3	11.2	90	1.04	1.04	33	3.06
37	2022.02.27	2453993	0	1	62	No	No	No	No	No	Yes	121	82	6.6	4.25	1.94	2.19072	223	11.3	13.3	0.25	35	28	24	17	52	2.3	249	65.6	43.6	2	9.1	4.2	4.9	0.99	74	399.9	5.65		3.75	0.99	1.57	1.83	10.1	106	0.94	0.94	33.2	3.13
38	2022.03.01	2455534	0	2	67	No	No	No	No	No	Yes	110	73	6.3	3.4	2.4	1.41667	169	10.1	16.8	0.17		11	15	23	65	2.6	232	68.6	40.3	1.4	10.5	2.8	7.7	0.85	57	393	5..59	0	6.66	1.59	1.53	4.29	10.5	106	0.97	0.97	35.8	3.57
39	2022.03.01	2282718	0	1	70	No	No	No	Yes	Yes	Yes	142	85	7.2	3.7	2.6	1.42308	194	8.6	16.3	0.166		16	18	19	76	3.6	270	69.3	42.8	1.6	10	3.4	6.6	1.02	80	437	9.24	0	4.46	0.66	1.45	2.7	9.9	118	0.92	0.92	31	3.12
40	2022.03.04	2457233	0	2	71	No	No	No	No	No	No	159	94	7	4.78	1.86	2.56989	176	11.1	13.2	0.2	35.3	28	21	33	73	1.7	215	79.4	48	1.5	22	5.9	16.1	0.73	58	237	6.08		3.97	1.48	1.14	2.4	10.3	110	0.95	0.96	38.4	3.33
41	2022.03.04	2457235	0	1	72	No	No	Yes	No	Yes	Yes	134	86	6.7	4.75	1.54	3.08442	222	10.2	12	0.23	26.3	23	17	37	79	3.3	325	74.8	47.4	1.7	12.8	4.1	8.7	0.79	58	294	5.12	0	3.57	1.3	1.16	2.09	10.5	106	0.97	0.97	34.5	3.18
42	2022.03.07	2458364	0	2	70	No	No	No	No	No	Yes	146	63	4.5	3.4	0.7	4.85714	198	8.1	16.3	0.159		11	15	21	123	1.7	255	71.9	43.8	1.6	6	2.6	3.4	0.82	38	171	5.97	0	5.33	1.06	1.84	2.98	10.5	100	0.97	0.97	30.9	2.67
43	2022.03.07	2458363	0	1	69	No	No	Yes	No	Yes	Yes	173	90	6.4	4.27	105	0.0406667	255	10.2	11.2	0.26	25.2	20	36	102	77	2.5	276	69.2	42.9	1.6	14	4.7	9.3	1.35	99	367	7.64		6.78	2.16	1.33	4.76	10.3	103	0.95	0.95	29.5	3.54
44	2022.03.07	2300874	0	1	75	No	No	Yes	No	Yes	Yes	157	86	6.5	4.5	1.4	3.21429	155	9.4	16	0.145		21	26	14	56	2.8	257	68.5	46.4	2.1	15.1	5.5	9.6	1	90	239	5.66		3.36	1.1	1.3	1.65	11.3	89	1.05	1.05	29.4	2.67
45	2022.03.07	2300875	0	2	73	No	No	Yes	No	Yes	Yes	164	83	3	1.5	1.2	1.25	212	9	16.3	0.19		24	28	20	52	3.8	218	73.7	45.2	1.6	12.7	4.5	8.2	1.24	92	311	5.78		4.34	1.2	1.53	2.35	10.6	98	0.98	0.98	34.7	2.76
46	2022.03.09	2460062	0	2	73	No	No	No	Yes	No	Yes	128	72	6.6	3.46	2.59	1.33591	239	11.1	13.4	0.26	33.3	19	14	21	83	1.8	245	68.9	43.7	1.7	14.5	4	10.5	1.17	81	401	5.87		5.27	0.99	1.69	3.88	10.3	110	0.95	0.96	33.1	2.99
47	2022.03.10	2260164	0	2	66	No	No	Yes	Yes	Yes	Yes	140	76	7	5.05	1.51	3.34437	228	13	17.6	0.3	48.6	25	20	29	78	1.4	241	73.3	48.4	1.9	11.2	2.8	8.4	0.77	56	365	6.91		7.27	1.93	1.51	6.53	10.5	106	0.97	0.97	35	2.78
48	2022.03.11	2190595	0	1	66	No	No	Yes	Yes	Yes	Yes	144	92	3.8	2.45	1.03	2.37864	150	10	11.8	0.15	25.9	24	16	24	65	1.9	320	65.5	41.5	1.7	19.7	5.2	14.5	0.99	82	323	5.96		3.26	1.92	0.86	2.02	11.4	93	1.06	1.05	35.5	2.65
49	2022.03.11	2461262	0	2	66	No	No	No	No	Yes	Yes	125	74	5.2	2.87	2.02	1.42079	179	10.4	12.6	0.19	28.4	14	14	20	79	5	274	71	45.4	1.8	10.2	3	7.2	0.59	59	293	5.35		5.05	2.39	1.03	3.56	10.5	106	0.97	0.97	30.1	3.44
50	2022.03.23	2244869	0	2	62	No	No	No	No	Yes	Yes	129	90	5.2	2.48	2.33	1.06438	214	9.9	11.5	0.21	23.8	15	17	28	86	2.5	259	66.4	38.7	1.4	7.1	2.2	4.9	1	61	437	4.76		5.85	2.01	0.79	4.34	10.3	110	0.95	0.96	32.9	3.44
51	2022.03.24	2466152	0	2	77	No	No	Yes	No	Yes	Yes	129	81	4.4	2.9	1.1	2.63636	173	10.3	16.4	0.178		155	18	14	70	1.1	198	69.6	45.5	1.9	11.9	4.4	7.5	0.73	55	215	5		3.22	0.74	1.37	1.41	11.5	86	1.06	1.06	34.1	2.44
52	2022.03.29	2467681	0	1	60	No	No	No	No	No	No	125	80	7.8	4.9	1.9	2.57895	242	8.3	16.8	0.201		21	17	33	72	2.2	263	70.7	43	1.6	16.3	4.1	12.2	1.05	74	439	4.89		4.29	1.64	0.95	3.14	10.2	104	0.94	0.94	28.5	2.92
53	2022.04.12	2471566	0	1	70	No	No	Yes	No	No	No	142	84	8.3	5.77	2.19	2.6347	247	11.4	14.1	0.28	38.1	23	22	31	82	1.6	278	76	45.9	1.5	12.8	5.2	7.6	0.94	81	410	6		5.73	2.06	1.14	4.33	10.2	104	0.94	0.94	28.8	2.67
54	2022.04.18	2473764	0	2	70	No	No	No	No	Yes	Yes	92	57	5.6	3.31	1.92	1.72396	163	13.8	18.2	0.22	55	16	21	15	84	6.2	183	75.7	41.6	1.2	18.4	5.9	12.5	0.93	71	246.4	4.63	0	4	0.72	1.01	2.82	11.5	91	1.06	1.06	31.5	3.26
55	2022.04.18	2328952	0	1	69	Yes	No	No	No	Yes	Yes	153	88	5.8	3.16	1.76	1.79545	141	11.7	14.5	0.16	38.5	20	17	39	92	9.6	202	74.1	42.1	1.3	13.8	4.4	9.4	1.02	71	292.8	5.87		6.35	2.53	0.89	4.87	10.6	104	0.98	0.98	31.6	2.87
56	2022.04.18	2016107	0	1	70	No	No	Yes	No	Yes	Yes	147	91	4	2.63	1.03	2.5534	142	12.2	14.7	0.17	43.4	58	38	38	48	3.2	264	73.8	43.8	1.5	14	5.8	8.2	0.9	74	373.2	6.68	0	3.36	1.77	0.98	1.73	10.6	98	0.98	0.98	34.3	2.51
57	2022.04.19	2474195	0	1	63	No	No	No	No	No	Yes	110	72	5.7	3.56	1.78	2	202	10.8	13.2	0.22	31.7	32	22	20	65	1.1	265	82.6	46.8	1.3	31.5	8.8	22.7	0.84	68	536.7	5.45		4.83	1.29	1.25	3.15	10.9	94	1.01	1.01	36	2.73
58	2022.04.24	2252167	0	2	78	No	No	No	No	No	No	124	77	4.1	2.5	1.2	2.08333	156	8.5	16.1	0.133		9	25	10	71	2.9	181	78.6	46.9	1.5	13	5.1	7.9	1.11	74	361.4	4.97		3.86	0.78	1.44	2.15	11.1	91	1.03	1.03	27.7	2.51
59	2022.05.05	2336440	0	2	60	No	No	No	No	No	Yes	120	82	4.6	2.8	1.4	2	197	8.9	16.2	0.175		37	35	26	74	2.8	225	72.1	49.2	2.1	9.6	3.7	5.9	0.91	63	423	6.45		4.43	1.59	1.52	2.34	10.4	101	0.96	0.96	32.3	2.26
60	2022.05.07	2315934	0	1	74	Yes	No	Yes	Yes	No	Yes	148	84	6.7	4.6	1.3	3.53846	256	9.1	16.2	0.233		15	13	30	50	2.1	291	76.9	46.8	1.6	11	3.8	7.2	0.73	65	297	7.71		4.08	1.95	1.2	2.45	10.8	95	1	1	31.5	2.76
61	2022.05.07	2244860	0	1	68	Yes	No	Yes	Yes	No	No	167	93	5.7	3.6	1.4	2.57143	195	8.6	16.9	0.168		37	24	43	112	4.6	204	65.9	46	2.3	21.9	6.4	15.5	0.99	73	266	9.58		4.44	1.49	0.96	3.08	11.3	89	1.05	1.05	37.4	2.82
62	2022.05.09	2479577	0	2	62	No	No	No	No	No	No	140	80	5.3	2.7	2.26	1.19469	192	12.9	16.3	0.25	49.1	14	18	20	94	1.7	169	62.9	41.4	1.9	11.2	4.1	7.1	0.83	72	361	5.44		4.39	1.07	1.3	2.52
63	2022.05.10	2479949	0	1	74	No	No	No	No	No	No	104	52	5.4	3.7	1.1	3.36364	148	8.6	16.1	0.127		21	22	23	79	4.7	227	72.4	48.6	2	16.8	6.2	10.6	0.82	70	306	6.88	0	2.96	0.42	1.43	1.29	12.8	74	1.19	1.19	31.5	2.57
64	2022.05.10	2479986	0	2	71	No	No	No	No	No	No	135	65	4	2.4	1.2	2	185	10.1	16.6	0.186		23	20	11	60	4.5	215	68.5	42.7	1.7	11.7	3.8	7.9	0.83	52	218	5.18	0	4.31	0.99	1.43	2.13	10.8	101	1	1	36	3.22
65	2022.05.12	2481076	0	1	66	No	Yes	No	No	No	Yes	126	80	5.9	3.32	2.16	1.53704	169	11.9	15.3	0.2	40.2	24	19	39	89	1.7	206	81.6	48.4	1.5	15.7	4.5	11.2	0.68	55	350	7.23	0	5.31	1.54	0.8	3.71	11.9	82	1.1	1.1	36.5	3.28
66	2022.05.15	2482091	0	1	66	Yes	Yes	Yes	Yes	No	Yes	133	85	6	3.9	1.6	2.4375	178	9.4	16.6	0.167		21	19	32	92	2.2	247	81.1	47.1	1.4	15.9	4.6	11.3	0.89	71	317	9.27	0	4.86	2.39	1.06	2.86	10	108	0.93	0.93	31.7	2.89
67	2022.05.16	2249359	0	1	60	Yes	No	Yes	Yes	No	Yes	123	80	5.3	3.11	1.87	1.6631	152	9.8	11.2	0.15	24.1	20	19	15	33	1.5	274	65.6	47.9	2.7	16.2	5.3	10.9	0.5	62	272	6.11	0	4.48	0.6	1.88	2.11	11.7	89	1.08	1.08	31	2
68	2022.05.16	2482595	0	1	61	Yes	Yes	Yes	Yes	No	Yes	179	111	3	1.8	1	1.8	146	8.1	16.9	0.117		18	15	39	70	6.2	244	69.6	44.4	1.8	14.5	4.5	10	0.48	60	289	8.4	0	3.35	1.21	0.89	1.91	11.2	95	1.04	1.04	33	2.68
69	2022.05.18	2217486	0	1	73	No	No	Yes	Yes	Yes	Yes	109	76	11.3	8.66	2.12	4.08491	210	12.3	15	0.26	44.6	40	24	58	86	7.5	219	64.5	39.9	1.6	8	3.7	4.3	0.73	89	371	4.17	1	4.88	1.39	1.85	2.51	9.8	120	0.91	0.91	28.4	2.55
70	2022.05.23	2209390	0	2	61	No	No	Yes	No	No	Yes	144	76	8.1	4.35	3.45	1.26087	273	10.7	12.2	0.29	30	23	18	9	46			75.8	51.1	2.1	10.2	3.6	6.6		56	191.5	5.25	0	6.58	1.11	1.17	4.3	10.5	100	0.97	0.97	36.2	2.95
71	2022.05.31	2491128	0	1	63	Yes	No	No	No	No	Yes	109	78	6.1	3.2	2.1	1.52381	192	8.8	16.6	0.169		13	14	23	80	3.3	233	69.6	43.6	1.7	7.4	2.7	4.7	0.88	97	476	5.41	0	4.2	0.81	1.51	2.33	10.5	99	0.97	0.97	32.8	2.57
72	2022.05.31	2491173	0	1	60	No	No	No	No	No	No	121	78	6.5	3.1	2.8	1.10714	169	10.7	16.5	0.181		13	19	24	56	0.9	223	74.8	46.4	1.6	15.3	4.4	10.9	0.64	102	405	4.81	0	4.63	1.11	1.14	2.97	10.4	101	0.96	0.96	34.4	2.77
73	2022.08.22	2542436	0	1	80	No	No	Yes	Yes	Yes	Yes	140	90	6.3	3.86	1.88	2.05319	191	11	12.7	0.2	31.9	19	13	17	50	0.9	252	73.9	46.1	1.7	11.7	5.4	6.3	1.05	103	441.1	10.59	0	6.48	1.15	1.36	4.47	9.9	107	0.92	0.92	36.3	2,65
74	2022.09.01	2548440	0	1	60	No	No	No	Yes	No	Yes	135	75	6.3	3.79	1.95	1.94359	206	10.5	11.5	0.22	28.7	110	58	90	55			77.1	46.3	1.5	14.4	3.6	10.8		60	426.7	5.16	0	5.04	2.99	0.83	2.76	10.3	105	0.95	0.95	31.6	2.4
75	2022.09.01	2548257	0	1	60	No	No	Yes	Yes	Yes	Yes	133	95	6.1	3.62	1.67	2.16766	255	7.6	14.7	7.6		17	15	19	58	1.3	279	69.4	43.3	1.7	13.8	3.4	10.4	0.72	67	284	5.19	0	5.39	1.17	1.2	3.67	10.4	102	0.96	0.96	34.1	3.07
76	2022.10.08	2562389	0	1	63	No	No	Yes	Yes	Yes	Yes	149	91	5.6	2.9	2.12	1.36792	247	8.4	15.8	0.208		17	18	15	73	1.7	213	73.4	42.7	1.4	16.8	6.5	10.3	0.76	64	301.3	5.81	0	4.51	0.83	1.37	3.18	9.7	110	0.9	0.9	34.8	3.29
77	2022.10.08	2210576	0	2	72	No	No	No	No	No	Yes	100	84	3.9	2.31	1.22	1.89344	162	7.4	16.7	0.12		12	17	21	51	1.2	207	84.1	46	1.2	13.2	5.7	7.5	0.72	51	331.9	4.8	0	4.65	0.54	1.51	3.11	10.7	95	0.99	0.99	29.2	3.36
78	2022.10.09	2320930	0	1	72	No	Yes	Yes	Yes	No	Yes	132	84	5.5	3.49	1.43	2.44056	187	11.4	13.7	0.21	36.6	18	22	40	52	2.1	208	79.4	46.8	1.4	14.6	6.5	8.1	0.77	81	408.1	5.68	0	3.34	0.93	1.61	1.56	10.1	108	0.94	0.94	29.4	2.9
79	2022.10.09	2563113	0	1	62	No	No	Yes	No	Yes	No	142	94	8.9	5.87	2.46	2.38618	195	11.5	14.1	0.22	35.7	29	23	81	80	3	234	78	44.5	1.3	9.3	4.7	4.6	0.72	67	413.8	5.18	0	2.58	1.6	1.1	1.26	11.4	86	1.06	1.06	32	3
80	2022.10.09	2563086	0	1	66	No	No	Yes	No	No	Yes	167	110	4.5	2.81	1.34	2.09701	184	10.6	12.6	0.19	29.7	24	24	61	78	3.5	237	71.4	47.7	2	18.1	7.6	10.5	0.8	89	434.9	5.62	0	4	1.41	1.44	2.3	10.4	99	0.96	0.96	32.5	2.24
81	2022.10.09	2563112	0	2	60	No	No	No	No	No	No	108	78	4.2	3.13	0.85	3.68235	134	13.3	18.3	0.18	49.6	11	15	7	56	1.5	175	75.5	45.6	1.5	8.3	4.1	4.2	0.58	60	224.3	4.72	0	4.58	0.73	1.95	2.37	10.6	99	0.98	0.98	30.5	3.1
82	2022.10.10	2232859	0	1	70	No	No	Yes	Yes	Yes	Yes	128	80	7	4.84	1.67	2.8982	162	10.8	12.4	0.17	31.5	17	24	24	71	1.9	263	80	43.2	1.2	6.6	3.2	3.4	2.32	198	536.3	5.25	0	4.35	1.27	1.23	2.67	10.6	99	0.98	0.98	38	4.39
83	2022.10.11	2564091	0	2	62	No	No	No	No	No	No	132	80	4.2	2.58	1.26	2.04762	171	8.1	17.7	0.139		26	25	38	88	8.3	201	81	50.9	1.7	6.3	3.3	3	0.68	75	366	5.53	0	6.59	1.17	2.23	4.03	10.9	94	1.01	1.01	40.4	3.19
84	2022.10.11	2491928	0	1	67	No	No	Yes	Yes	Yes	Yes	157	89	5.5	3.62	1.36	2.66176	153	9.9	16.6	0.15		37	17	61	40	6	254	72.5	43.5	1.5	11.5	5	6.5	1.05	81	288.5	8.14	0	3.51	1.75	0.84	2.25	11.3	88	1.05	1.04	34.1	3.1
85	2022.10.12	2219991	0	1	67	No	No	No	No	No	No	125	78	4.5	2.92	1	2.92	110	11.5	14.2	0.13	36.9	30	24	30	93	1	221	68.6	45.4	2	13	6.5	6.5	0.81	75	300.6	5.29	0	3	0.79	1.16	1.78	10.8	93	1	1	34.2	3.07
86	2022.10.13	2565125	0	2	80	No	No	No	No	No	Yes	142	80	6.1	4.15	1.53	2.71242	239	10	16.1	0.239		11	16	13	83	7.1	218	75.4	43.7	1.4	7.8	3.1	4.7	1.12	70	394.9	5.38	0	5.07	2.43	0.96	3.39	9.8	109	0.91	0.91	32.6	3.85
87	2022.10.20	2352573	0	1	95	No	No	No	Yes	No	Yes	103	67	8.4	6.73	1.48	4.5473	289	11.2	13.4	0.32	34.1	10	18	3	60			71.6	32.6	0.8	6.8	2.2	4.6		97	381.9	13.33	0	5.1	1.08	1.01	3.79	10.1	109	0.94	0.94	37.7	3.42
88	2022.10.25	2571002	0	1	82	Yes	No	No	Yes	Yes	Yes	137	87	4.6	2.65	1.58	1.67722	209	98.4	11.4	0.2	26.5	11	15	14	78	2	168	65.7	41	1.7	5.9	3.2	2.7	0.72	66	212.3	7.51	0	3.68	0.52	1.19	2.28	10.1	108	0.94	0.94	3	2.82
89	2022.10.26	2199938	0	2	81	No	No	Yes	No	No	Yes	175	70	4.3	3.05	1.05	2.90476	173	10.4	11.4	0.18	26.9	11	24	12	69	1.5	141	75	43.7	1.4	9.9	5.4	4.5		59	261.2	4.81	0	4.94	0.78	1.57	3.15	11	92	1.02	1.02	33	2.99
90	2022.10.27	2250976	0	1	60	No	No	Yes	No	Yes	No	152	99	6.7	4.04	1.76	2.29545	222	10.7	12.7	0.24	30.1	21	23	26	69	3	221	70.8	42.3	1.5	11	4.3	6.7	0.64	59	401.9	6.67	0	4.66	1.61	0.99	3.06	10.9	92	1.01	1.01	36.3	2.3
91	2022.10.31	2573349	0	1	81	No	No	Yes	Yes	No	Yes	127	74	4.7	2.52	1.44	1.75	163	10.8	17.3	0.175		16	16	19	62	2	212	75.5	47.3	1.7	8.7	4.6	4.1	0.85	80	409.7	7.44	0	3.92	0.88	1.65	2.11	10.6	99	0.98	0.98	34.7	2.41
92	2022.10.31	2573369	0	2	76	No	No	Yes	No	Yes	Yes	141	74	5.1	3.58	1.23	2.91057	157	12.6	16.2	0.2	45.6	10	17	19	52	0.6	171	76.3	42.1	1.2	14.3	6.5	7.8	0.65	51	303.9	5.31	0	4.43	0.98	1.58	2.81	12	82	1.11	1.11	30.2	3.42
93	2022.11.01	2574289	0	1	63	Yes	Yes	Yes	Yes	No	Yes	156	87	8.4	5.27	2.23	2.36323	205	11.5	13.6	0.24	36.9	13	15	36	45	6	265	65.7	44.2	2.1	19.9	4.9	15	0.73	60	346	5.66	0	4.03	1.53	1.1	2.43	11.1	92	1.03	1.03	38.8	2.34
94	2022.11.08	2212379	0	2	78	No	No	Yes	Yes	No	Yes	141	81	6.9	4.91	1.81	2.71271	143	11	14	0.16	32.4	34	26	20	79	2.8	287	70.1	45.4	1.8	10.9	3.8	7.1	1.15	59	405	7.63	0	6.68	1.88	1.23	4.2	10.5	97	0.97	0.97	31	2.97
95	2022.11.13	2308106	0	1	61	No	Yes	No	No	No	Yes	129	79	6.1	3.51	2.31	1.51948	232	11	13.2	0.26	32.7	18	22	20	53	0.3	217	64.6	44	2.1	13.4	4.7	8.7	0.65	67	276	4.97	0	3.24	1.17	0.99	1.73	11	92	1.02	1.02	38	2.03
96	2022.11.14	2578713	0	2	60	No	No	No	Yes	No	No	120	74	7	4.88	1.69	2.88757	233	10.8	13.3	0.25	32.5	17	17	13	65	2.1	220	68.7	41.3	1.5	6	2.3	3.7	0.5	45	260	8.54	0	4.92	1.12	1.28	3	11	91	1.02	1.02	33.5	2.73
97	2022.11.15	2579399	0	2	67	No	No	No	No	No	No	140	77	4	1.84	1.83	1.00546	173	11.8	14.5	0.2	39.6	22	20	53	74	2	213	72.2	48.1	2	22	6.5	15.5	0.67	57	280	5.2	0	4.94	1.28	1.31	2.82	10.4	99	0.96	0.96	34.7	3.29
98	2022.11.15	2579400	0	1	70	No	No	Yes	No	No	No	150	93	4	2.25	1.34	1.6791	149	10.9	12.7	0.16	31.9	18	22	26	37	3.5	214	67.6	43.3	1.8	10.9	4.3	6.6	0.75	65	404	6.14	0	3.49	0.62	1.34	1.66	10.3	100	0.95	0.95	31.8	3.07
99	2022.11.15	2579376	0	2	66	No	No	Yes	No	No	No	152	84	5.4	3.4	1.51	2.25166	291	10.3	12.1	0.3	27.4	19	18	20	61	1.8	185	75	46.4	1.6	10	2.7	7.3	0.84	65	391	5.74	0	5.14	1.98	1.27	3	10.5	101	0.97	0.97	32.2	3.85
100	2022.11.15	2579711	0	1	60	No	No	Yes	No	No	No	160	99	3.7	1.99	1.48	1.34459	235	10.9	12.8	0.26	32.7	24	23	17	87	4.8	200	65	40.8	1.7	10.1	3.4	6.7	0.57	66	304	5.2	0	3.62	1.14	1.2	1.71	10.4	99	0.96	0.96	33.4	2.48
101	2022.11.18	2580862	0	1	77	Yes	No	No	No	Yes	Yes	136	86	6.3	4.66	1.14	4.08772	189	10.8	16.1	0.204		18	18	30	86	2.5	225	69.9	47.8	2.2	21.8	6.3	15.5	0.79	66	386	6.1	0	3.33	0.79	1	1.87	11	91	1.02	1.02	41.5	3.57
102	2022.11.22	2582428	0	1	60	No	Yes	No	No	No	No	145	94	4.9	3.31	1.17	2.82906	144	10.6	16.5	0.151		40	27	62	80	5.4	297	66.8	40.8	1.6	10	3.4	6.6	0.74	74	288	6.11	0	5.78	1.75	1.51	1.75	10.6	99	0.98	0.98	32.4	2
103	2022.11.22	2582450	0	1	60	No	No	Yes	No	No	No	147	98	8.9	7.06	1.39	5.07914	171	12.2	16.6	0.21	42.2	22	18	38	96	2.9	314	73.2	49.3	2.1	14.8	4.2	10.6	0.74	73	314	5.09	0	4.75	0.96	1.42	2.78	10	105	0.93	0.93	36.6	2.79
104	2022.11.22	2300581	0	1	80	No	No	Yes	No	No	Yes	135	78	7.4	4.97	1.71	2.90643	205	11.5	14.3	0.23	38.5	17	21	30	71	14.1	212	65.5	43.2	1.9	10.5	3.9	6.6	0.9	78	390	5.35	0	3.81	1.46	0.89	2.19	10	105	0.93	0.93	37.2	2.91
105	2022.11.24	2583520	0	1	60	No	No	No	No	No	Yes	139	100	4.4	3.07	0.85	3.61176	133	11	17.5	0.146		11	15	11	65	1.8	141	65.9	41.1	1.7	25.8	7.2	18.6	0.83	87	369	4.97	0	4.41	1.01	1.46	2.79	11	91	1.03	1.03	36.1	2.75
[truncated: 3 more columns]
